# Supplementary material for: Identification of a New Giant Emrbryo Allele, and Integrated Transcriptomics and Metabolomics Analysis of Giant Embryo Development in Rice
Source: Front Plant Sci. 2021 Aug 9;12:697889. doi: 10.3389/fpls.2021.697889 (PMC8381154; doi:10.3389/fpls.2021.697889)
Supplement: Supplementary file 7 [file Table_3.XLSX]

## Sheet: 代谢物信息总览表
ID	Metabolite	Metab ID	VIP_value	P_value	FC(EG/CG)	Regulation type	KEGG Compound ID	Library ID	M/Z	Mode	Adducts	Formula	Retention time	RSD	Fragmentation Score	Theoretical Fragmentation Score	Mass Error	CAS ID	KEGG Compound First Category	KEGG Compound Second Category	KEGG Pathway ID	KEGG Pathway Description	KEGG Pathway First Category	KEGG Pathway Second Category	HMDB Superclass	HMDB Class	HMDB Subclass	EG-1	EG-2	EG-3	EG-4	EG-5	EG-6	CG-1	CG-2	CG-3	CG-4	CG-5	CG-6	QC01	QC02	QC03
pos_7	3-Hydroxynevirapine glucuronide	metab_6	1.0837	0.01019	1.03433	UP	-	HMDB0060743	481.131	pos	M+Na, 2M+K, 2M+Na, 2M+NH4, M+K, M+NH4	C21H22N4O8	2.9009	0.0398641	-	75.5	-3.69096	-	-	-	-	-	-	-	Organic oxygen compounds	Organooxygen compounds	Carbohydrates and carbohydrate conjugates	7.2328	7.1674	7.2174	7.1002	7.0093	6.7575	6.8016	6.8738	6.845	6.8011	6.8854	6.8676	7.0383	7.0078	7.0095
pos_11	PC(16:0/0:0)[U]	metab_10	1.277	0.000828	0.962143	Down	-	-	496.339	pos	M+H, 2M+Na, 2M+H, M+Na, M+H-H2O	C24H50NO7P	6.4445	0.0520138	80.6	-	-1.38575	-	-	-	-	-	-	-	-	-	-	7.4821	7.6907	7.4791	7.4375	7.4976	7.5374	7.5932	7.8782	7.8477	7.809	7.8016	7.9702	7.7465	7.7068	7.709
pos_43	Pantothenic Acid	metab_42	1.2865	0.0001432	1.04833	UP	C00864	HMDB0000210	220.118	pos	M+H, M+Na, M+H-H2O, M+H-2H2O	C9H17NO5	1.8576	0.0372816	88.8	-	-1.12678	79-83-4	Vitamins and Cofactors	Vitamins	map01100;map01110;map00770;map00410	Metabolic pathways;Biosynthesis of secondary metabolites;Pantothenate and CoA biosynthesis;beta-Alanine metabolism	Metabolism;Metabolism;Metabolism;Metabolism	Global and overview maps;Global and overview maps;Metabolism of cofactors and vitamins;Metabolism of other amino acids	Organic oxygen compounds	Organooxygen compounds	Alcohols and polyols	6.4655	6.4483	6.4347	6.3621	6.3243	6.612	6.0797	6.0776	6.1352	6.14	6.161	6.2716	6.3623	6.3326	6.3369
pos_63	AMINOHYDROXYBUTYRIC ACID	metab_62	1.0446	0.0002962	1.02675	UP	-	-	84.0448	pos	M+H-2H2O, M+H, M+H-H2O	C4H9NO3	0.5778	0.0348891	89.7	-	3.31715	-	-	-	-	-	-	-	-	-	-	7.2384	7.0859	7.1939	7.1392	7.1233	7.1373	6.9937	6.9363	7.0449	6.9974	6.9706	6.857	7.1044	7.0776	7.0793
pos_70	1-Kestose	metab_69	1.3292	0.0001042	0.955711	Down	C03661	HMDB0011729	543.132	pos	M+NH4, M+K, M+Na	C18H32O16	0.6814	0.0324011	83.5	-	-0.722057	470-69-9	-	-	-	-	-	-	Organic oxygen compounds	Organooxygen compounds	Carbohydrates and carbohydrate conjugates	6.5913	6.744	6.7642	6.6711	6.6126	6.4579	6.9364	6.9945	6.9261	6.9384	6.8826	7.0094	6.8563	6.8313	6.833
pos_81	M-Coumaric acid	metab_80	2.1495	1.43e-05	0.868536	Down	C12621	HMDB0001713	147.044	pos	M+H-H2O, M+H, M+NH4	C9H8O3	2.4204	0.0332849	87.1	-	-1.30303	588-30-7	-	-	map00360	Phenylalanine metabolism	Metabolism	Amino acid metabolism	Phenylpropanoids and polyketides	Cinnamic acids and derivatives	Hydroxycinnamic acids and derivatives	4.8589	5.0345	5.1218	5.3895	5.3574	4.8756	5.883	6.019	5.896	5.8101	5.811	5.856	5.6715	5.6459	5.6476
pos_83	4-Hydroxycrotonic acid	metab_82	1.9823	0.0004663	1.1563	UP	-	HMDB0003381	205.07	pos	M+H-H2O, 2M+H, M+H	C4H6O3	2.1885	0.035035	-	65.2	3.86861	24587-49-3	-	-	-	-	-	-	Lipids and lipid-like molecules	Fatty Acyls	Fatty acids and conjugates	5.6476	5.2017	5.0919	5.0058	4.9653	5.4754	4.485	4.8744	4.5702	4.3369	4.5552	4.3232	5.1294	5.1025	5.1041
pos_91	Homolanthionine	metab_90	1.3334	0.002574	1.05087	UP	-	HMDB0002034	251.069	pos	M+H-H2O, M+Na, M+H-2H2O	C8H16N2O6S	0.9065	0.0396583	-	55.8	-1.58082	31982-10-2	-	-	-	-	-	-	Organic acids and derivatives	Carboxylic acids and derivatives	Amino acids, peptides, and analogues	6.6801	6.5253	6.7123	6.6133	6.54	6.2779	6.2585	6.1914	6.3431	6.2129	6.3829	6.0553	6.5309	6.5012	6.5016
pos_127	Methyl phenylacetate	metab_126	1.2283	7.11e-06	1.04055	UP	-	HMDB0032617	133.065	pos	M+H-H2O, M+H, M+H-2H2O	C9H10O2	2.5354	0.0386205	60.8	-	-1.1766	101-41-7	-	-	-	-	-	-	Benzenoids	Benzene and substituted derivatives	Not Available	6.3058	6.2714	6.3448	6.3422	6.3002	6.3384	6.115	6.0762	6.1379	5.9506	6.0704	6.0758	6.2588	6.2291	6.2311
pos_135	Elenaic acid	metab_134	1.1126	0.001547	0.967185	Down	-	HMDB0039136	207.065	pos	M+H-2H2O, M+H-H2O, 2M+ACN+Na	C11H14O6	3.0301	0.0375903	-	73.4	-1.5725	34422-12-3	-	-	-	-	-	-	Organic acids and derivatives	Carboxylic acids and derivatives	Dicarboxylic acids and derivatives	6.5662	6.8089	6.8825	6.9007	6.9006	6.7449	7.0146	7.0538	7.0343	7.0184	7.021	7.0461	6.9749	6.9461	6.9478
pos_136	Cyclocalopin D	metab_135	1.2665	0.0003753	1.04504	UP	-	HMDB0039813	539.173	pos	M+Na, M+K, M+NH4	C23H32O13	3.0376	0.0433841	-	64.1	-0.959352	-	-	-	-	-	-	-	Organic oxygen compounds	Organooxygen compounds	Carbohydrates and carbohydrate conjugates	6.6343	6.4901	6.4112	6.5876	6.6133	6.5924	6.3048	6.3052	6.4208	6.125	6.2695	6.2086	6.4906	6.4576	6.4592
pos_138	1-O-Feruloyl-beta-D-glucose	metab_137	1.7554	1.68e-05	0.925715	Down	C17759	-	339.107	pos	M+H-H2O, M+H, M+H-2H2O	C16H20O9	3.0601	0.0323645	56.9	-	-1.12476	-	-	-	-	-	-	-	-	-	-	6.2146	6.5428	6.544	6.394	6.3887	6.1881	6.8278	6.9515	6.8326	6.9131	6.8698	6.9486	6.7536	6.7287	6.7304
pos_169	8-deoxy-J2-IsoP	metab_168	1.9912	0.001675	0.86385	Down	-	-	317.211	pos	M+H, M+Na, M+H-H2O	C20H28O3	6.1826	0.0352858	51.7	-	-1.49653	-	-	-	-	-	-	-	-	-	-	5.0027	5.2053	4.4581	4.287	4.8306	4.4336	5.5317	5.4318	5.4809	5.5563	5.0163	5.6476	5.2222	5.195	5.1969
pos_181	Heteroxanthin	metab_180	1.0539	0.003319	0.962838	Down	C16353	HMDB0036873	623.406	pos	M+H-H2O, M+Na, M+H	C40H56O4	6.4221	0.0473915	-	72.9	-0.919201	29488-00-4	-	-	map01100;map01110;map00232	Metabolic pathways;Biosynthesis of secondary metabolites;Caffeine metabolism	Metabolism;Metabolism;Metabolism	Global and overview maps;Global and overview maps;Biosynthesis of other secondary metabolites	Lipids and lipid-like molecules	Prenol lipids	Triterpenoids	5.9821	5.9311	6.0135	5.9832	5.9594	5.7323	6.2963	6.1909	6.2023	6.2138	6.0403	6.0321	6.0567	6.0185	6.0254
pos_262	13(S)-HOTrE	metab_261	2.6486	4.38e-07	0.819779	Down	C16316	-	317.208	pos	M+H-H2O, M+Na, M+H	C18H30O3	6.3249	0.0363142	56.6	-	-1.94523	-	-	-	map00592	alpha-Linolenic acid metabolism	Metabolism	Lipid metabolism	-	-	-	5.0717	5.3407	4.9766	4.9083	5.0659	4.8978	5.9976	6.3183	6.1394	6.238	5.9064	6.3139	5.9111	5.8852	5.8831
pos_279	1-O-Sinapoyl-beta-D-glucose	metab_278	1.1767	0.002114	0.960986	Down	C01175	-	369.118	pos	M+H-H2O, M+H, M+H-2H2O	C17H22O10	3.0301	0.038377	58.6	-	-1.04594	-	-	-	map00940	Phenylpropanoid biosynthesis	Metabolism	Biosynthesis of other secondary metabolites	-	-	-	6.1239	6.4128	6.4878	6.518	6.5298	6.3511	6.6569	6.6866	6.6636	6.6435	6.6354	6.6973	6.5984	6.5693	6.5704
pos_284	1,2,3-Trihydroxybenzene	metab_283	1.9183	9.84e-08	1.11837	UP	C01108	HMDB0013674	127.039	pos	M+H, 2M+H, M+H-H2O	C6H6O3	2.7944	0.023845	57.3	-	-0.645815	87-66-1	-	-	-	-	-	-	Benzenoids	Phenols	Benzenetriols and derivatives	5.5524	5.5605	5.5692	5.414	5.3544	5.4272	4.8146	4.8852	4.8959	4.8981	4.9599	4.9443	5.2993	5.2808	5.2822
pos_304	L-Lysine	metab_303	1.1755	0.002324	1.04424	UP	C00047	HMDB0000182	147.112	pos	M+H-H2O, M+H	C6H14N2O2	0.498	0.0404455	83.3	-	-1.08211	56-87-1	Peptides	Amino acids	map01100;map00310;map01110;map00300;map01210;map00780;map02010;map01230;map00970;map00960	Metabolic pathways;Lysine degradation;Biosynthesis of secondary metabolites;Lysine biosynthesis;2-Oxocarboxylic acid metabolism;Biotin metabolism;ABC transporters;Biosynthesis of amino acids;Aminoacyl-tRNA biosynthesis;Tropane, piperidine and pyridine alkaloid biosynthesis	Metabolism;Metabolism;Metabolism;Metabolism;Metabolism;Metabolism;Environmental Information Processing;Metabolism;Genetic Information Processing;Metabolism	Global and overview maps;Amino acid metabolism;Global and overview maps;Amino acid metabolism;Global and overview maps;Metabolism of cofactors and vitamins;Membrane transport;Global and overview maps;Translation;Biosynthesis of other secondary metabolites	Organic acids and derivatives	Carboxylic acids and derivatives	Amino acids, peptides, and analogues	6.6541	6.5925	6.5825	6.5102	6.6015	6.9824	6.3671	6.356	6.4094	6.3413	6.4141	6.3439	6.6111	6.5793	6.5831
pos_308	Ornithine	metab_307	2.1546	2.66e-08	1.15816	UP	C00515;C01602;C00077	HMDB0000214	133.097	pos	M+H-H2O, M+H	C5H12N2O2	0.498	0.0416366	72.2	-	0.171023	3184-13-2	-;-;Peptides	-;-;Amino acids	map01100;map00220;map01110;map01210;map02010;map00330;map00480;map01230	Metabolic pathways;Arginine biosynthesis;Biosynthesis of secondary metabolites;2-Oxocarboxylic acid metabolism;ABC transporters;Arginine and proline metabolism;Glutathione metabolism;Biosynthesis of amino acids	Metabolism;Metabolism;Metabolism;Metabolism;Environmental Information Processing;Metabolism;Metabolism;Metabolism	Global and overview maps;Amino acid metabolism;Global and overview maps;Global and overview maps;Membrane transport;Amino acid metabolism;Metabolism of other amino acids;Global and overview maps	Organic acids and derivatives	Carboxylic acids and derivatives	Amino acids, peptides, and analogues	5.3689	5.1469	5.273	5.312	5.306	5.3323	4.5058	4.4489	4.6036	4.5361	4.6739	4.6364	5.0948	5.0635	5.0642
pos_330	Argininosuccinic acid	metab_329	1.1313	0.002228	1.03575	UP	C03406	HMDB0000052	291.129	pos	M+H-H2O, M+H	C10H18N4O6	0.5635	0.0428671	76.9	-	-1.91397	2387-71-5	Peptides	Amino acids	map01100;map00220;map01110;map00250;map01230	Metabolic pathways;Arginine biosynthesis;Biosynthesis of secondary metabolites;Alanine, aspartate and glutamate metabolism;Biosynthesis of amino acids	Metabolism;Metabolism;Metabolism;Metabolism;Metabolism	Global and overview maps;Amino acid metabolism;Global and overview maps;Amino acid metabolism;Global and overview maps	Organic acids and derivatives	Carboxylic acids and derivatives	Amino acids, peptides, and analogues	6.9415	6.8328	6.8725	6.8585	6.7464	6.7415	6.6108	6.3949	6.5333	6.6228	6.7034	6.713	6.7683	6.7386	6.7347
pos_331	4-Methylene-L-glutamine	metab_330	1.579	3.09e-05	1.07119	UP	C01109	-	159.076	pos	M+H, M+NH4	C6H10N2O3	0.5706	0.0340205	71.5	-	-2.08448	-	-	-	map00660	C5-Branched dibasic acid metabolism	Metabolism	Carbohydrate metabolism	-	-	-	6.2303	6.0263	6.2321	6.0326	6.1413	6.2119	5.6641	5.6518	5.6921	5.7468	5.9294	5.7398	6.0129	5.9867	5.9885
pos_363	4-methylthiazole-5-acetic-acid	metab_362	1.2306	9.03e-05	1.05206	UP	-	-	140.016	pos	M+H-H2O, M+H	C6H7NO2S	0.7487	0.0396642	53.3	-	-2.3646	-	-	-	-	-	-	-	-	-	-	5.2355	5.0692	5.1129	5.0771	5.0734	5.0609	4.8995	4.8843	4.883	4.8729	4.8678	4.7059	5.024	4.9943	4.9947
pos_379	Cystathionine ketimine	metab_378	1.007	0.01842	1.03601	UP	-	HMDB0002015	186.021	pos	M+H-H2O, M+H	C7H9NO4S	0.9288	0.0370223	65.8	-	-2.19402	87254-95-3	-	-	-	-	-	-	Organic acids and derivatives	Carboxylic acids and derivatives	Amino acids, peptides, and analogues	6.3506	6.1706	6.2279	6.245	6.1941	5.933	6.0468	6.0194	6.0581	6.0187	5.9635	5.7243	6.1409	6.1112	6.116
pos_395	6,8-Dihydroxypurine	metab_394	1.0109	0.01219	0.955783	Down	-	HMDB0001182	153.04	pos	M+H-H2O, M+H	C5H4N4O2	1.0472	0.0363132	-	61.8	-2.0215	13231-00-0	-	-	-	-	-	-	Organoheterocyclic compounds	Imidazopyrimidines	Purines and purine derivatives	5.04	4.9426	4.7724	4.6906	4.6552	5.0351	5.0885	5.0451	5.0305	5.0654	5.0729	5.1814	5.0163	4.9866	4.9929
pos_402	1-(Malonylamino)cyclopropanecarboxylic acid	metab_401	1.309	1.92e-05	1.05325	UP	-	HMDB0031700	170.044	pos	M+H-H2O, M+H	C7H9NO5	1.0697	0.0374927	59.1	-	-1.69055	80550-27-2	-	-	-	-	-	-	Organic acids and derivatives	Carboxylic acids and derivatives	Amino acids, peptides, and analogues	5.6164	5.7255	5.7201	5.8188	5.8086	5.6214	5.4374	5.4818	5.445	5.3971	5.4259	5.3888	5.6417	5.612	5.6159
pos_403	N,N-Dihydroxy-L-tyrosine	metab_402	2.0424	3.03e-08	1.13829	UP	C15503	-	214.071	pos	M+H-H2O, M+H	C9H11NO5	1.0397	0.0341579	58	-	-1.55685	-	-	-	map00460;map01110	Cyanoamino acid metabolism;Biosynthesis of secondary metabolites	Metabolism;Metabolism	Metabolism of other amino acids;Global and overview maps	-	-	-	5.3638	5.4169	5.4572	5.3246	5.3498	5.3263	4.6293	4.7063	4.663	4.705	4.8904	4.7279	5.2043	5.1775	5.1806
pos_418	5-Hydroxy-L-tryptophan	metab_417	1.3393	3.84e-05	1.05582	UP	C00643	HMDB0000472	221.093	pos	M+H-H2O, M+H	C11H12N2O3	1.2431	0.0395419	76.5	-	-1.10196	4350-09-8	-	-	map01100;map00380	Metabolic pathways;Tryptophan metabolism	Metabolism;Metabolism	Global and overview maps;Amino acid metabolism	Organoheterocyclic compounds	Indoles and derivatives	Tryptamines and derivatives	5.8047	5.7454	5.6773	5.5432	5.6678	5.6672	5.2927	5.4235	5.3514	5.3664	5.4522	5.4163	5.5752	5.545	5.5467
pos_419	Indole-3-acetamide	metab_418	1.0463	0.004529	1.04615	UP	C02693	-	175.086	pos	M+H-H2O, M+H	C10H10N2O	1.2583	0.0515742	75.9	-	-0.706651	-	-	-	map00380	Tryptophan metabolism	Metabolism	Amino acid metabolism	-	-	-	4.9412	4.9387	4.8616	4.7364	4.8392	4.5936	4.519	4.6622	4.5932	4.6018	4.6528	4.6064	4.7465	4.7075	4.7092
pos_433	Quinone	metab_432	1.0885	0.0001147	0.959499	Down	C15602;C00472	HMDB0003364	109.029	pos	M+H, M+CH3OH+H	C6H4O2	1.4597	0.011434	59.3	-	1.49302	106-51-4	-	-	-	-	-	-	Organic oxygen compounds	Organooxygen compounds	Carbonyl compounds	4.7599	4.8552	4.9437	4.8378	4.8391	4.8354	5.0127	4.9763	5.0154	5.1027	5.0687	5.1224	4.9698	4.9775	4.979
pos_552	3,4-Dihydroxybenzaldehyde	metab_551	1.671	1.87e-06	0.914207	Down	C16700	HMDB0059965	171.065	pos	M+H, M+CH3OH+H	C7H6O3	2.3276	0.0424863	63.1	-	-2.00395	139-85-5	-	-	map00950	Isoquinoline alkaloid biosynthesis	Metabolism	Biosynthesis of other secondary metabolites	Organic oxygen compounds	Organooxygen compounds	Carbonyl compounds	4.7318	4.7956	4.7475	4.6297	4.6657	4.9345	5.1675	5.1702	5.1816	5.2285	5.2054	5.2266	5.0766	5.0423	5.0486
pos_661	Diosmin	metab_660	2.1142	1.93e-05	0.869666	Down	C10039	HMDB0029548	609.181	pos	M+H, M+Na	C28H32O15	4.3643	0.0347532	82.4	-	-0.401591	520-27-4	-	-	-	-	-	-	Phenylpropanoids and polyketides	Flavonoids	Flavonoid glycosides	4.6317	5.1437	5.1029	4.8977	4.8182	4.8499	5.7022	5.8496	5.7459	5.5188	5.5136	5.5267	5.4699	5.4402	5.4512
pos_752	PC(14:0/0:0)	metab_751	1.3105	0.0005911	0.950975	Down	-	LMGP01050012	468.308	pos	M+H, M+Na	C22H46NO7P	6.3175	0.0233789	71.3	-	-0.473075	-	-	-	-	-	-	-	-	-	-	5.756	5.9744	5.8002	5.8692	5.8858	5.9585	5.9623	6.204	6.1688	6.2036	6.1763	6.346	6.0874	6.0692	6.0707
pos_1040	Gingerglycolipid B	metab_1037	1.0855	0.0009782	0.969295	Down	-	HMDB0041094	701.371	pos	M+NH4, M+Na	C33H58O14	6.3473	0.0609127	-	80.6	-1.0064	88168-90-5	-	-	-	-	-	-	Lipids and lipid-like molecules	Glycerolipids	Glycosylglycerols	6.9404	6.8509	6.916	6.9135	6.9604	7.0348	7.2419	7.2536	7.2182	7.1158	7.1073	6.9975	7.1299	7.0838	7.086
pos_1097	9(S)-HPODE	metab_1094	1.9038	3.64e-06	0.895178	Down	C14827	HMDB0006940	335.219	pos	M+H-H2O, M+Na	C18H32O4	6.2051	0.115208	-	56.6	-1.70003	-	-	-	map01100;map00591	Metabolic pathways;Linoleic acid metabolism	Metabolism;Metabolism	Global and overview maps;Lipid metabolism	Lipids and lipid-like molecules	Fatty Acyls	Lineolic acids and derivatives	4.993	5.0825	4.9106	4.8063	4.9859	4.9374	5.4593	5.634	5.5323	5.5149	5.3513	5.7035	5.2663	5.3557	5.3569
pos_1122	Phytosphingosine	metab_1119	1.1034	0.005913	0.963081	Down	C12144	LMSP01030001;HMDB0004610	318.3	pos	M+H, M+Na	C18H39NO3	6.063	0.0313937	68.3	-	-1.89025	554-62-1	-	-	map00600;map01100	Sphingolipid metabolism;Metabolic pathways	Metabolism;Metabolism	Lipid metabolism;Global and overview maps	Organic nitrogen compounds	Organonitrogen compounds	Amines	6.5247	6.8361	6.5737	6.5094	6.5843	6.3128	6.8619	6.8724	6.8205	6.7861	6.7311	6.7771	6.7224	6.6981	6.6998
pos_1145	2,6-Dihydroxynaphthalene	metab_1142	1.2748	0.002133	1.05484	UP	-	-	193.086	pos	M+H, M+CH3OH+H	C10H8O2	2.181	0.0362996	70.1	-	-1.58838	-	-	-	-	-	-	-	-	-	-	5.897	5.9706	6.0423	6.1637	6.0329	5.6591	5.6531	5.6991	5.614	5.5608	5.626	5.7533	5.895	5.8671	5.8688
pos_1164	(2R,3R,4R)-2-Amino-4-hydroxy-3-methylpentanoic acid	metab_1161	1.7712	5.08e-05	1.08862	UP	-	LMFA01050440;HMDB0029449	130.086	pos	M+H-H2O, M+ACN+H	C6H13NO3	0.8916	0.0380964	-	57.7	-1.6397	-	-	-	-	-	-	-	Organic acids and derivatives	Carboxylic acids and derivatives	Amino acids, peptides, and analogues	6.5357	6.5919	6.6485	6.6741	6.7525	6.7023	5.959	5.925	5.9507	6.2664	6.2796	6.2758	6.5231	6.4934	6.4963
pos_1212	Betaine	metab_1209	1.0808	1.15e-06	0.974482	Down	C00719	HMDB0000043	118.086	pos	M+H, 2M+H	C5H11NO2	0.5853	0.0397213	52.1	-	-1.55936	107-43-7	-	-	map01100;map02010;map00260	Metabolic pathways;ABC transporters;Glycine, serine and threonine metabolism	Metabolism;Environmental Information Processing;Metabolism	Global and overview maps;Membrane transport;Amino acid metabolism	Organic acids and derivatives	Carboxylic acids and derivatives	Amino acids, peptides, and analogues	7.3034	7.2324	7.2726	7.3145	7.2648	7.3001	7.4493	7.4708	7.4211	7.4946	7.4821	7.5139	7.4258	7.3949	7.3978
pos_1224	Propyl gallate	metab_1221	1.9881	1.76e-06	1.10662	UP	C11155	HMDB0033835	213.074	pos	M+H, 2M+K	C10H12O5	0.5276	0.0436625	-	56.3	-6.09766	121-79-9	-	-	-	-	-	-	Benzenoids	Benzene and substituted derivatives	Benzoic acids and derivatives	6.4941	6.5421	6.6405	6.5228	6.5473	6.4013	5.8082	5.6751	5.9423	5.9566	6.0604	5.9338	6.3185	6.2853	6.2869
pos_1297	4-Methyl-5-thiazoleethanol	metab_1292	1.3655	1.65e-05	0.946783	Down	C04294	-	144.047	pos	M+H	C6H9NOS	0.4905	0.0398292	85.9	-	-1.86135	-	-	-	map00730;map01100	Thiamine metabolism;Metabolic pathways	Metabolism;Metabolism	Metabolism of cofactors and vitamins;Global and overview maps	-	-	-	5.435	5.6096	5.5218	5.5158	5.5539	5.4088	5.8184	5.8539	5.9205	5.797	5.7358	5.7767	5.6734	5.6424	5.6454
pos_1307	Ne-Methyl-L-lysine	metab_1302	1.5108	0.0002305	1.08416	UP	-	-	161.128	pos	M+H	C7H16N2O2	0.498	0.0511461	52.6	-	-2.31275	-	-	-	-	-	-	-	-	-	-	5.3085	5.3605	5.3707	5.1887	5.2522	5.6388	4.8508	4.8284	4.898	4.9704	5.0692	5.0094	5.2523	5.2135	5.2153
pos_1325	N8-Acetylspermidine	metab_1317	1.7899	2.03e-06	1.11033	UP	C01029	HMDB0002189	188.175	pos	M+H	C9H21N3O	0.5054	0.0426436	84.5	-	-1.66376	34450-15-2	-	-	-	-	-	-	Organic acids and derivatives	Carboximidic acids and derivatives	Carboximidic acids	5.1376	5.1824	5.1044	5.1798	5.305	5.0505	4.6341	4.6994	4.7482	4.5117	4.7292	4.5608	5.0357	5.0012	5.0077
pos_1337	L-2-Amino-5-(methylthio)pentanoic acid	metab_1327	1.7859	1.77e-05	1.1195	UP	C17213	HMDB0030406	164.074	pos	M+H	C6H13NO2S	0.5127	0.0534788	-	66.1	-2.61911	25148-30-5	-	-	map01210;map01110;map00966	2-Oxocarboxylic acid metabolism;Biosynthesis of secondary metabolites;Glucosinolate biosynthesis	Metabolism;Metabolism;Metabolism	Global and overview maps;Global and overview maps;Biosynthesis of other secondary metabolites	Organic acids and derivatives	Carboxylic acids and derivatives	Amino acids, peptides, and analogues	4.9675	4.8461	4.8356	4.7295	4.7699	4.7472	4.2496	4.0913	4.2979	4.3735	4.514	4.2851	4.6332	4.6036	4.5878
pos_1355	Shoyuflavone B	metab_1345	2.3045	1.02e-07	1.17566	UP	-	HMDB0034589	435.091	pos	M+CH3OH+H	C19H14O10	0.5202	0.0495141	-	86.4	-1.735	190712-88-0	-	-	-	-	-	-	Phenylpropanoids and polyketides	Isoflavonoids	Isoflav-2-enes	5.6132	5.5913	5.6214	5.4962	5.6379	5.743	4.6633	4.6054	4.8497	4.7688	4.9695	4.8105	5.3853	5.3505	5.3468
pos_1388	BERGENIN	metab_1377	1.0078	0.007642	1.03492	UP	C09919	-	329.085	pos	M+H	C14H16O9	0.5565	0.0463175	67.9	-	-4.42409	-	-	-	-	-	-	-	-	-	-	6.011	5.9413	5.9386	5.9419	5.8055	5.8144	5.7676	5.4921	5.6899	5.6771	5.8275	5.8023	5.8885	5.8642	5.8488
pos_1413	Diaminopimelic acid	metab_1402	1.2071	0.0008145	1.05231	UP	C00666	HMDB0001370	191.102	pos	M+H	C7H14N2O4	0.5853	0.0625098	73.1	-	-2.75275	583-93-7	-	-	map01100;map01110;map00300;map01230	Metabolic pathways;Biosynthesis of secondary metabolites;Lysine biosynthesis;Biosynthesis of amino acids	Metabolism;Metabolism;Metabolism;Metabolism	Global and overview maps;Global and overview maps;Amino acid metabolism;Global and overview maps	Organic acids and derivatives	Carboxylic acids and derivatives	Amino acids, peptides, and analogues	5.2648	4.9973	4.9927	5.0609	5.04	4.9375	4.7652	4.7933	4.8864	4.8018	4.8383	4.7023	4.977	4.9465	4.9231
pos_1575	1-Anilino-9,10-dioxo-2-anthroic acid	metab_1561	1.2203	8.07e-05	1.04477	UP	-	-	344.09	pos	M+H	C21H13NO4	0.9139	0.043383	71.5	-	-3.60027	-	-	-	-	-	-	-	-	-	-	5.8768	5.9999	6.1201	5.9527	5.9107	5.8762	5.6595	5.682	5.6965	5.7156	5.7478	5.7036	5.9064	5.8733	5.875
pos_1626	Delta-Hexalactone	metab_1612	1.3033	0.001975	1.07277	UP	-	-	115.075	pos	M+H	C6H10O2	1.0104	0.0332296	69.5	-	0.444965	-	-	-	-	-	-	-	-	-	-	4.6242	4.4694	4.6013	4.7384	4.765	4.5222	4.1638	4.1879	4.2118	4.3277	4.5136	4.4353	4.5804	4.561	4.5523
pos_1650	N-Alpha-acetyllysine	metab_1636	1.2112	0.003841	0.938049	Down	C12989	HMDB0000446	189.123	pos	M+H	C8H16N2O3	1.0621	0.0414473	68.7	-	-2.05007	1946-82-3	-	-	-	-	-	-	Organic acids and derivatives	Carboxylic acids and derivatives	Amino acids, peptides, and analogues	4.2375	4.4558	4.3575	4.4164	4.3727	4.4355	4.5014	4.554	4.4831	4.8272	4.8102	4.8348	4.5926	4.5629	4.5608
pos_1690	Dinorpromazine	metab_1676	1.3847	3.63e-07	1.06314	UP	-	-	257.113	pos	M+H	C15H16N2S	1.167	0.0399998	86.5	-	8.39338	-	-	-	-	-	-	-	-	-	-	5.2324	5.2228	5.2925	5.1817	5.1987	5.3404	4.922	4.9602	4.9051	4.9153	4.9654	4.9315	5.1542	5.1245	5.1243
pos_1709	N,N'-Bis(gamma-glutamyl)cystine	metab_1695	1.1195	2.41e-05	1.03172	UP	-	HMDB0038458	481.106	pos	M+H-H2O	C16H26N4O10S2	1.2279	0.0398011	-	78	-0.38357	23052-19-9	-	-	-	-	-	-	Organic acids and derivatives	Carboxylic acids and derivatives	Amino acids, peptides, and analogues	6.6903	6.6341	6.6733	6.6199	6.6134	6.6561	6.4171	6.477	6.5118	6.4218	6.4874	6.3457	6.5973	6.567	6.5683
pos_1734	1-(beta-D-Ribofuranosyl)-1,4-dihydronicotinamide	metab_1720	1.1803	0.0004008	1.05323	UP	C15497	HMDB0011648	257.113	pos	M+H	C11H16N2O5	1.367	0.0341903	-	52.7	-1.54309	-	-	-	-	-	-	-	Organic oxygen compounds	Organooxygen compounds	Carbohydrates and carbohydrate conjugates	4.8808	4.7109	4.8941	4.793	4.8053	4.8604	4.5433	4.5152	4.4829	4.6714	4.7153	4.5536	4.7627	4.7331	4.75
pos_1743	Aloesol	metab_1729	1.9929	1.92e-06	0.863437	Down	-	HMDB0035712	252.123	pos	M+NH4	C13H14O4	1.3898	0.0391841	-	58	-1.12297	94356-35-1	-	-	-	-	-	-	Organoheterocyclic compounds	Benzopyrans	1-benzopyrans	4.252	4.1934	4.0367	3.9202	4.042	4.1249	4.7154	4.6995	4.5583	4.8536	4.814	4.8143	4.6241	4.5944	4.5955
pos_1787	Dopaxanthin quinone	metab_1773	1.3532	0.01238	1.08314	UP	C17753	HMDB0012220	406.128	pos	M+NH4	C18H16N2O8	1.5216	0.0322078	-	66.5	7.84118	-	-	-	map01110	Biosynthesis of secondary metabolites	Metabolism	Global and overview maps	Organic acids and derivatives	Carboxylic acids and derivatives	Amino acids, peptides, and analogues	5.1855	4.9115	5.2285	5.1654	5.1229	5.4536	4.8416	4.9067	5.1265	4.6696	4.8116	4.3267	5.0695	5.0571	5.0415
pos_1800	Lepidimoic acid	metab_1786	2.0127	7.57e-05	1.1503	UP	-	HMDB0041096	667.17	pos	2M+Na	C12H18O10	1.5444	0.028301	-	54.6	0.969896	157676-09-0	-	-	-	-	-	-	Organic oxygen compounds	Organooxygen compounds	Carbohydrates and carbohydrate conjugates	5.3152	5.2002	5.0901	5.319	5.3288	5.5224	4.6742	4.7254	4.8608	4.2922	4.695	4.3763	5.1436	5.1217	5.1234
pos_1879	5-Methyl-THF	metab_1865	1.0033	0.0001814	1.03167	UP	-	-	460.193	pos	M+H	C20H25N7O6	1.7483	0.0361837	87.5	-	-1.53882	-	-	-	-	-	-	-	-	-	-	5.6771	5.6	5.6205	5.5793	5.585	5.5638	5.4786	5.4179	5.5324	5.3994	5.3896	5.3755	5.5534	5.5243	5.5293
pos_1891	3-Hydroxyanthranilic acid	metab_1877	1.0829	0.002596	1.05589	UP	C00632	HMDB0001476	154.05	pos	M+H	C7H7NO3	1.78	0.0358066	62.7	-	-1.87595	548-93-6	-	-	map01100;map00380	Metabolic pathways;Tryptophan metabolism	Metabolism;Metabolism	Global and overview maps;Amino acid metabolism	Benzenoids	Benzene and substituted derivatives	Benzoic acids and derivatives	4.3879	4.5407	4.4461	4.2253	4.2138	4.2467	4.0512	4.1662	4.1167	4.0816	4.1395	4.1259	4.2878	4.2581	4.2656
pos_1958	4-(2-Nitroethyl)phenyl primeveroside	metab_1944	1.4456	3.74e-07	0.931567	Down	-	HMDB0031742	484.142	pos	M+Na	C19H27NO12	1.9186	0.0470973	-	62	-0.283835	-	-	-	-	-	-	-	Organic oxygen compounds	Organooxygen compounds	Carbohydrates and carbohydrate conjugates	4.6832	4.5412	4.653	4.6751	4.6006	4.6539	5.0394	4.9026	4.9651	4.9964	4.9518	4.9944	4.8746	4.8585	4.8338
pos_1970	Pisatoside	metab_1956	1.9393	0.001931	1.15398	UP	-	HMDB0039127	325.103	pos	M+ACN+Na	C10H15NO7	1.9428	0.0487659	-	51.6	8.96207	18814-39-6	-	-	-	-	-	-	Organic oxygen compounds	Organooxygen compounds	Carbohydrates and carbohydrate conjugates	5.5849	5.3429	5.6101	5.6925	5.6864	5.3579	5.4312	4.5998	5.0208	4.9605	4.3474	4.475	5.1397	5.1101	5.0992
pos_1979	11-Methylgerberinol	metab_1965	1.1534	0.02418	1.07712	UP	-	HMDB0041441	361.11	pos	M+H-H2O	C22H18O6	1.9582	0.0353181	-	60.7	8.5316	173559-76-7	-	-	-	-	-	-	Phenylpropanoids and polyketides	Coumarins and derivatives	Hydroxycoumarins	4.3887	4.5556	4.4208	4.9638	4.9417	4.5611	4.2806	4.5885	4.435	4.1301	4.1925	4.2122	4.5975	4.5736	4.5692
pos_2027	N-butylformamide	metab_2013	1.7898	1.28e-07	0.879745	Down	-	HMDB0062600	140.047	pos	M+K	C5H11NO	2.0589	0.0467062	-	52.9	-6.80036	871-71-6	-	-	-	-	-	-	Organic acids and derivatives	Carboxylic acids and derivatives	Carboxylic acid derivatives	3.7314	3.801	3.7843	3.6311	3.6824	3.7068	4.2649	4.2765	4.3288	4.1941	4.1343	4.1917	4.0845	4.0548	4.0463
pos_2105	Scytalone	metab_2091	1.9261	0.0007181	0.848051	Down	C00779	-	195.065	pos	M+H	C10H10O4	2.2108	0.0441039	92	-	-1.30822	-	-	-	-	-	-	-	-	-	-	3.5989	3.5935	4.1713	4.3567	4.1123	3.6126	4.6467	4.7744	4.5883	4.5162	4.5512	4.5693	4.4062	4.37	4.3784
pos_2119	Everninic Acid	metab_2105	1.8633	0.0001523	0.871578	Down	-	-	165.054	pos	M+H-H2O	C9H10O4	2.2471	0.0271154	60.6	-	-1.50734	-	-	-	-	-	-	-	-	-	-	3.6802	3.812	3.9856	4.2731	4.1255	4.2753	4.5738	4.625	4.6254	4.654	4.6025	4.6296	4.4311	4.41	4.4118
pos_2141	Delphinidin 3-glucosylglucoside	metab_2126	2.7858	0.0001915	1.32326	UP	-	HMDB0041594	592.137	pos	M+H-2H2O	C27H31O17+	2.2976	0.0117258	-	62.2	-8.1864	58213-36-8	-	-	-	-	-	-	Phenylpropanoids and polyketides	Flavonoids	Flavonoid glycosides	5.673	5.2852	5.3296	5.3101	5.2258	5.8416	4.2905	4.2648	4.4007	3.1344	4.5635	4.0315	5.1372	5.1271	5.1314
pos_2145	Glutamylleucine	metab_2130	1.7345	0.001706	1.12681	UP	-	HMDB0028823	283.126	pos	M+Na	C11H20N2O5	2.3125	0.0124434	57	-	-1.90226	5969-52-8	-	-	-	-	-	-	Organic acids and derivatives	Carboxylic acids and derivatives	Amino acids, peptides, and analogues	4.8783	4.6618	4.7793	5.1069	5.132	4.773	4.0257	4.1374	4.2765	4.3595	4.7257	4.5055	4.7515	4.7414	4.7432
pos_2196	Triazolopropionic acid	metab_2181	2.1791	0.001475	1.31476	UP	-	HMDB0061058	252.036	pos	M+2Na-H	C9H9N3O3	2.4358	0.0389937	-	76.5	0.582901	-	-	-	-	-	-	-	Organoheterocyclic compounds	Azoles	Triazoles	3.8924	3.6501	3.5972	3.4671	3.6812	4.6843	2.6334	2.9765	3.2572	2.8048	3.1775	2.6232	3.627	3.5979	3.6281
pos_2240	Sinapyl alcohol	metab_2225	1.2418	5.03e-06	1.03819	UP	C02325	HMDB0013070	193.086	pos	M+H-H2O	C11H14O4	2.5354	0.0379975	84.1	-	-1.42911	537-33-7	-	-	map01100;map00940;map01110	Metabolic pathways;Phenylpropanoid biosynthesis;Biosynthesis of secondary metabolites	Metabolism;Metabolism;Metabolism	Global and overview maps;Biosynthesis of other secondary metabolites;Global and overview maps	Benzenoids	Phenols	Methoxyphenols	6.8233	6.7912	6.845	6.8532	6.8168	6.8608	6.6213	6.5932	6.6433	6.4573	6.5786	6.5887	6.7673	6.7376	6.7407
pos_2289	Gardenoside	metab_2274	1.6958	0.0008241	0.922603	Down	C09779	-	369.118	pos	M+H-2H2O	C17H24O11	2.6416	0.0414001	64.6	-	-0.51281	-	-	-	-	-	-	-	-	-	-	5.6118	5.9574	5.8744	6.2009	6.2972	6.1877	6.5409	6.5739	6.5213	6.5205	6.4264	6.5773	6.3893	6.3578	6.3594
pos_2295	4-Hydroxyphenylpyruvic acid	metab_2280	1.045	0.02492	1.05769	UP	C01179	HMDB0000707	163.039	pos	M+H-H2O	C9H8O4	2.6569	0.0347987	64.9	-	-1.4751	156-39-8	-	-	map01100;map01110;map01210;map00130;map01230;map00950;map00350;map00261;map00400	Metabolic pathways;Biosynthesis of secondary metabolites;2-Oxocarboxylic acid metabolism;Ubiquinone and other terpenoid-quinone biosynthesis;Biosynthesis of amino acids;Isoquinoline alkaloid biosynthesis;Tyrosine metabolism;Monobactam biosynthesis;Phenylalanine, tyrosine and tryptophan biosynthesis	Metabolism;Metabolism;Metabolism;Metabolism;Metabolism;Metabolism;Metabolism;Metabolism;Metabolism	Global and overview maps;Global and overview maps;Global and overview maps;Metabolism of cofactors and vitamins;Global and overview maps;Biosynthesis of other secondary metabolites;Amino acid metabolism;Biosynthesis of other secondary metabolites;Amino acid metabolism	Benzenoids	Benzene and substituted derivatives	Phenylpyruvic acid derivatives	4.6276	5.071	5.0753	5.1609	5.1231	4.659	4.6576	4.6455	4.6005	4.6839	4.7168	4.7917	4.8916	4.8649	4.8666
pos_2354	Entacapone	metab_2339	2.0099	9.31e-07	0.877804	Down	C07943	HMDB0012226	270.089	pos	M+H-2H2O	C14H15N3O5	2.863	0.0474448	-	55.2	5.2103	130929-57-6	-	-	-	-	-	-	Phenylpropanoids and polyketides	Cinnamic acids and derivatives	Hydroxycinnamic acids and derivatives	4.9088	4.8563	4.784	4.7069	4.745	4.5531	5.4843	5.4877	5.3385	5.5205	5.3928	5.3052	5.2618	5.2321	5.2227
pos_2481	Xanthurenic Acid	metab_2466	1.1968	0.003491	1.08297	UP	C02470	HMDB0000881	188.034	pos	M+H-H2O	C10H7NO4	3.2429	0.038835	58.5	-	-1.63306	59-00-7	-	-	map00380	Tryptophan metabolism	Metabolism	Amino acid metabolism	Organoheterocyclic compounds	Quinolines and derivatives	Quinoline carboxylic acids	3.7213	4.035	3.8793	3.9779	4.2468	3.9105	3.5981	3.8004	3.5928	3.5773	3.708	3.673	3.8934	3.8724	3.8602
pos_2531	Rothindin	metab_2516	2.0835	0.0001094	0.842498	Down	-	HMDB0036609;LMPK12050043	445.113	pos	M+H	C22H20O10	3.418	0.0323035	52.6	-	-0.859411	63347-43-3	-	-	-	-	-	-	Phenylpropanoids and polyketides	Isoflavonoids	Isoflavonoid O-glycosides	3.3528	4.038	4.0548	4.0846	3.9926	3.9385	4.6495	4.7472	4.7436	4.5447	4.5629	4.5994	4.4356	4.4196	4.4078
pos_2577	Gladiatoside C1	metab_2562	1.6657	0.01671	1.14199	UP	-	HMDB0036255	584.173	pos	M+NH4	C29H26O12	3.5934	0.0420573	-	61.1	-5.45333	-	-	-	-	-	-	-	Phenylpropanoids and polyketides	Flavonoids	Flavonoid glycosides	5.1467	5.0904	4.6857	4.7249	4.6423	4.2467	4.2846	4.2429	4.7943	3.9054	4.089	3.6723	4.6583	4.6294	4.6251
pos_2599	(2R,6x)-7-Methyl-3-methylene-1,2,6,7-octanetetrol 2-glucoside	metab_2584	1.2303	0.002836	0.946407	Down	-	HMDB0033216	389.178	pos	M+Na	C16H30O9	3.7148	0.033656	-	58.3	-0.720595	219814-32-1	-	-	-	-	-	-	Lipids and lipid-like molecules	Fatty Acyls	Fatty acyl glycosides	5.2395	5.4672	5.4809	5.4884	5.4907	5.0489	5.6674	5.7436	5.6222	5.6648	5.6417	5.7002	5.5974	5.5716	5.5733
pos_2637	Linalool oxide D 3-[apiosyl-(1->6)-glucoside]	metab_2622	2.1882	0.003354	0.805351	Down	-	HMDB0031367	487.215	pos	M+Na	C21H36O11	3.9593	0.0363586	-	93	-0.79479	-	-	-	-	-	-	-	Organic oxygen compounds	Organooxygen compounds	Carbohydrates and carbohydrate conjugates	3.0687	4.2678	4.5754	4.0233	3.5058	3.6121	4.9084	5.1049	4.8627	4.5994	4.5101	4.6394	4.6248	4.5969	4.5986
pos_2649	3-Phenylpropanal	metab_2634	1.0852	0.005378	0.942214	Down	-	HMDB0033716	135.08	pos	M+H	C9H10O	4.0511	0.0406355	68.2	-	-1.65081	104-53-0	-	-	-	-	-	-	Benzenoids	Benzene and substituted derivatives	Not Available	4.2106	4.2661	4.2553	4.269	4.2588	3.8485	4.4544	4.547	4.4731	4.3923	4.3823	4.3991	4.3734	4.348	4.3398
pos_2660	Astragalin	metab_2645	1.5724	0.001481	0.901473	Down	C12249	LMPK12111725;HMDB0037429	449.108	pos	M+H	C21H20O11	4.1272	0.0478965	96.7	-	-0.178434	480-10-4	-	-	map01110;map00944	Biosynthesis of secondary metabolites;Flavone and flavonol biosynthesis	Metabolism;Metabolism	Global and overview maps;Biosynthesis of other secondary metabolites	Phenylpropanoids and polyketides	Flavonoids	Flavonoid glycosides	4.1682	4.4837	4.6966	4.1507	4.0635	4.2682	4.7562	4.975	4.8141	4.7331	4.7487	4.627	4.6577	4.6174	4.6297
pos_2669	Chalcolactone	metab_2654	1.471	0.001497	0.913429	Down	C18848	-	351.216	pos	M+H	C20H30O5	4.2723	0.0346251	72.1	-	-1.56865	-	-	-	-	-	-	-	-	-	-	4.8353	4.615	4.2068	4.2802	4.4024	4.4064	4.9387	4.942	4.8941	4.8924	4.7973	4.8165	4.783	4.7601	4.755
pos_2683	RHOIFOLIN	metab_2668	1.84	9.88e-05	0.894098	Down	C12627	HMDB0038848	579.171	pos	M+H	C27H30O14	4.418	0.0341958	70.4	-	-0.563849	17306-46-6	-	-	map00944	Flavone and flavonol biosynthesis	Metabolism	Biosynthesis of other secondary metabolites	Phenylpropanoids and polyketides	Flavonoids	Flavonoid glycosides	4.4645	5.0257	5.0097	4.8486	4.7587	4.7769	5.391	5.5159	5.464	5.3035	5.289	5.3419	5.236	5.2063	5.2223
pos_2691	Oenin	metab_2676	2.3882	1.58e-06	0.832476	Down	C12140	LMPK12010372	493.134	pos	M+H	C23H24O12	4.4791	0.0281587	83.4	-	-0.367159	-	-	-	map00942	Anthocyanin biosynthesis	Metabolism	Biosynthesis of other secondary metabolites	-	-	-	4.2842	4.7133	4.8147	4.657	4.4656	4.4832	5.5346	5.6786	5.5237	5.4026	5.4292	5.3668	5.2828	5.261	5.2626
pos_2706	Peonidin 3-O-glucoside	metab_2691	2.2992	1.85e-06	0.844157	Down	C12141	-	463.123	pos	M+H	C22H22O11	4.6093	0.0357808	80.7	-	-0.666076	-	-	-	map00942	Anthocyanin biosynthesis	Metabolism	Biosynthesis of other secondary metabolites	-	-	-	4.3131	4.7526	4.8396	4.6528	4.5194	4.5668	5.4865	5.6212	5.5053	5.3888	5.4065	5.3395	5.2773	5.2498	5.2515
pos_2718	Sucrose 1',4'-(4,4'-dihydroxy-3,3'-dimethoxy-b-truxinate)	metab_2703	1.1175	0.01919	0.946002	Down	-	HMDB0036978	717.2	pos	M+Na	C32H38O17	4.7549	0.0355705	-	53.4	-0.505026	-	-	-	-	-	-	-	Phenylpropanoids and polyketides	Stilbenes	Stilbene glycosides	5.0437	5.1299	5.1747	4.7022	4.6372	5.1052	5.1773	5.3833	5.1418	5.2866	5.2366	5.2679	5.1936	5.1689	5.1656
pos_2719	Yucalexin P15	metab_2704	1.2329	0.002385	0.932068	Down	-	HMDB0036753	331.19	pos	M+H	C20H26O4	4.7625	0.0620117	76.1	-	-1.30218	119626-52-7	-	-	-	-	-	-	Lipids and lipid-like molecules	Prenol lipids	Diterpenoids	4.6309	4.5116	4.4222	4.1733	4.2639	4.1717	4.7397	4.6528	4.6898	4.6397	4.6965	4.6627	4.6423	4.5958	4.5972
pos_2757	SOLIDAGENONE	metab_2742	1.6241	0.03553	0.847262	Down	-	-	317.211	pos	M+H	C20H28O3	5.3527	0.0434302	81.2	-	-0.862046	-	-	-	-	-	-	-	-	-	-	4.7731	4.5828	4.4474	4.1302	4.4021	2.6882	4.9418	4.8564	4.8957	4.8862	4.9694	4.9854	4.7839	4.7485	4.7559
pos_2812	Malvidin	metab_2797	2.405	1.3e-06	0.837262	Down	C08716	LMPK12010004	331.081	pos	M+H	C17H14O7	5.8812	0.0385103	81.4	-	-0.735398	-	-	-	-	-	-	-	-	-	-	4.4181	4.8299	4.7866	4.8298	4.7647	4.7411	5.688	5.866	5.7779	5.529	5.4693	5.5543	5.4401	5.4125	5.4105
pos_2816	Isoquinoline	metab_2801	1.2463	0.002374	1.05705	UP	C06323	HMDB0034244	130.065	pos	M+H	C9H7N	5.9118	0.035797	55.3	-	-0.760988	119-65-3	-	-	-	-	-	-	Organoheterocyclic compounds	Isoquinolines and derivatives	Not Available	5.5956	5.122	5.2307	5.2049	5.2672	5.3212	4.9374	5.0605	5.0031	4.9538	5.0808	4.9929	5.2165	5.1869	5.1942
pos_2948	(all-Z)-8,11,14-Heptadecatrienal	metab_2932	2.2688	0.0006562	0.826465	Down	C16343	HMDB0041333	271.205	pos	M+Na	C17H28O	6.1976	0.00348984	-	68.6	7.95995	56797-44-5	-	-	map00592	alpha-Linolenic acid metabolism	Metabolism	Lipid metabolism	Lipids and lipid-like molecules	Fatty Acyls	Fatty aldehydes	4.506	4.6622	4.2445	4.3257	4.5183	3.9619	5.721	5.2082	5.2536	5.4467	4.5885	5.5058	5.0938	5.0908	5.0925
pos_3245	Pyropheophytin b	metab_3222	1.3502	0.003571	1.0619	UP	-	HMDB0034248	865.504	pos	M+K	C53H70N4O4	6.9303	0.0887872	-	84.2	0.911975	77331-75-0	-	-	-	-	-	-	Benzenoids	Benzene and substituted derivatives	Styrenes	5.988	5.841	5.9751	5.8406	5.7315	5.5652	5.3555	5.3781	5.7748	5.498	5.4657	5.4324	5.7652	5.6882	5.7388
pos_3278	Propanoyl phosphate	metab_3255	1.134	3.83e-05	0.957501	Down	C02876	-	155.01	pos	M+H	C3H7O5P	7.0351	0.0473082	58.9	-	-2.6924	-	-	-	map01100;map00660;map00640	Metabolic pathways;C5-Branched dibasic acid metabolism;Propanoate metabolism	Metabolism;Metabolism;Metabolism	Global and overview maps;Carbohydrate metabolism;Carbohydrate metabolism	-	-	-	4.9497	4.9762	4.9442	5.0228	5.0581	4.9955	5.2017	5.1774	5.3172	5.1281	5.2054	5.2459	5.1652	5.1292	5.131
pos_3939	PS(DiMe(11,5)/DiMe(13,5))	metab_3909	1.3848	2.69e-05	1.06077	UP	-	HMDB0061563	969.647	pos	M+NH4	C52H90NO12P	7.9309	0.0533238	-	65.3	-7.01049	-	-	-	-	-	-	-	Lipids and lipid-like molecules	Glycerophospholipids	Glycerophosphoserines	5.7281	5.7912	5.8383	5.7385	5.764	5.9665	5.5236	5.4483	5.5187	5.3498	5.465	5.5261	5.585	5.5554	5.5398
pos_4103	DG(18:1(9Z)/18:3(6Z,9Z,12Z)/0:0)	metab_4072	1.3611	5.04e-07	0.951624	Down	-	HMDB0007220	617.513	pos	M+H	C39H68O5	7.0951	0.0592181	57.2	-	-1.34155	-	-	-	-	-	-	-	Lipids and lipid-like molecules	Fatty Acyls	Lineolic acids and derivatives	5.9021	5.9582	6.0215	5.9216	5.9125	5.8752	6.2153	6.1732	6.2618	6.2309	6.2293	6.2899	6.1273	6.0825	6.0845
pos_4251	Demeclocycline	metab_4217	1.1991	0.01282	0.922387	Down	-	HMDB0014756	429.088	pos	M+H-2H2O	C21H21ClN2O8	6.7503	0.209161	-	57.3	6.85447	127-33-3	-	-	-	-	-	-	Phenylpropanoids and polyketides	Tetracyclines	Not Available	4.5002	3.7969	4.0983	4.3768	4.2016	4.2356	4.4143	4.4427	4.4889	4.782	4.7063	4.4964	5.3179	5.4562	5.5024
pos_4302	PE-NMe(18:2(9Z,12Z)/18:4(6Z,9Z,12Z,15Z))	metab_4265	1.4248	0.03616	1.09618	UP	-	HMDB0113175	813.511	pos	M+ACN+Na	C42H72NO8P	6.6307	0.141717	-	64.9	-5.75088	-	-	-	-	-	-	-	Lipids and lipid-like molecules	Glycerophospholipids	Glycerophosphoethanolamines	5.4662	5.43	5.5941	5.7351	5.9061	5.7915	4.5781	4.5799	5.4371	5.2268	5.518	5.6068	5.7032	5.5965	5.6044
pos_4341	All-trans-3,4-Didehydroretinoate	metab_4302	1.6499	0.0005657	1.11533	UP	-	HMDB0060092	316.23	pos	M+NH4	C20H26O2	6.5714	0.0227448	-	69.8	9.17923	-	-	-	-	-	-	-	Lipids and lipid-like molecules	Prenol lipids	Retinoids	4.6815	4.5069	4.7832	4.7115	4.5471	4.6054	4.246	4.1041	4.5198	4.0884	4.119	3.88	4.6111	4.5933	4.595
pos_4384	1-(11Z-eicosenoyl)-glycero-3-phosphate	metab_4345	1.1751	0.0174	1.05046	UP	-	HMDB0062305;LMGP10050026	509.261	pos	M+2Na-H	C23H45O7P	6.5414	0.126699	-	66.6	-0.592981	-	-	-	-	-	-	-	Lipids and lipid-like molecules	Glycerophospholipids	Glycerophosphates	6.1432	6.067	6.5556	6.2963	6.0803	6.0624	5.9619	5.8057	6.1607	5.9273	5.9019	5.66	4.4321	4.3373	4.3424
pos_4530	CAY10444	metab_4487	1.4711	0.0001481	1.07524	UP	-	-	288.199	pos	M+H	C15H29NO2S	6.3996	0.0364284	76.4	-	-2.23093	-	-	-	-	-	-	-	-	-	-	5.3845	5.4199	5.3489	5.2909	5.4459	5.3375	5.0868	5.0877	5.1535	4.8656	4.9983	4.7805	5.3341	5.3068	5.3071
pos_4696	3-Phenylpropyl formate	metab_4653	1.4875	0.0002339	1.09127	UP	-	HMDB0034471	165.091	pos	M+H	C10H12O2	6.2651	0.018649	59	-	-1.66095	104-64-3	-	-	-	-	-	-	Benzenoids	Benzene and substituted derivatives	Not Available	4.5975	4.641	4.6138	4.5879	4.6389	4.226	4.1704	4.2251	4.1561	4.0893	4.196	4.1844	4.36	4.3734	4.3747
pos_4722	5,20-DiHETE	metab_4678	2.0926	0.0009115	0.826094	Down	-	HMDB0062614	301.216	pos	M+H-2H2O	C20H32O4	6.2351	0.03816	-	60	-1.62365	-	-	-	-	-	-	-	Lipids and lipid-like molecules	Fatty Acyls	Eicosanoids	4.5032	4.3397	4.1057	3.8702	4.2353	3.3099	5.1027	4.756	4.751	5.0448	4.8713	4.9672	4.6848	4.6552	4.6836
pos_4945	(+)-Prosopinine	metab_4900	1.1056	0.000327	0.957016	Down	C10167	-	314.268	pos	M+H	C18H35NO3	5.9878	0.0384273	84.1	-	-2.36652	-	-	-	-	-	-	-	-	-	-	4.8602	4.9307	4.917	4.7836	4.8737	4.7944	5.0714	4.986	4.9916	5.1646	5.0886	5.1671	5.007	4.9765	4.9807
pos_4974	3-Indolepropionic acid	metab_4929	1.2635	0.003949	1.07049	UP	-	-	190.086	pos	M+H	C11H11NO2	5.9118	0.0359946	78.3	-	-1.42943	-	-	-	-	-	-	-	-	-	-	4.924	4.3937	4.5018	4.4765	4.5367	4.6263	4.2027	4.3364	4.2768	4.211	4.3702	4.2537	4.5122	4.4825	4.4895
pos_5025	4'-Hydroxyacetophenone 4'-[4-hydroxybenzoyl-(->5)-apiosyl-(1->2)-glucoside]	metab_4980	1.7424	2.42e-06	0.907325	Down	-	HMDB0036332	515.154	pos	M+H-2H2O	C26H30O13	5.6434	0.0430588	-	63.2	-0.56449	228405-07-0	-	-	-	-	-	-	Organic oxygen compounds	Organooxygen compounds	Carbohydrates and carbohydrate conjugates	4.5571	4.8475	4.8387	4.712	4.7249	4.6935	5.1559	5.3122	5.169	5.261	5.1665	5.2072	5.1072	5.0703	5.0847
pos_5048	Methyl 3,4-dicaffeoylquinate	metab_5003	1.2361	0.003891	1.05074	UP	-	HMDB0037093	545.165	pos	M+H	C27H28O12	5.4216	0.0332379	-	59.9	-0.404554	345642-66-2	-	-	-	-	-	-	Organic oxygen compounds	Organooxygen compounds	Alcohols and polyols	6.4017	6.2559	6.5119	6.1855	6.0377	6.4834	5.9754	5.9969	5.9533	6.0821	6.1155	5.9238	6.2422	6.2167	6.2184
pos_5094	Etoposide glucuronide	metab_5049	1.2405	0.00291	0.947036	Down	C11245	HMDB0060635	747.21	pos	M+H-H2O	C35H40O19	4.7395	0.0357375	-	60	-3.60618	-	-	-	-	-	-	-	Lignans, neolignans and related compounds	Lignan lactones	Podophyllotoxins	4.8485	4.9872	4.9577	5.2025	5.1903	5.2702	5.4055	5.4438	5.2881	5.3602	5.3014	5.3607	5.2833	5.2539	5.2605
pos_5102	Isovitexin 2''-O-glucoside	metab_5057	2.1929	4.78e-07	0.857622	Down	-	HMDB0029484;LMPK12110217	577.155	pos	M+H-H2O	C27H30O15	4.6859	0.0363181	-	56	-0.686607	60767-80-8	-	-	-	-	-	-	Phenylpropanoids and polyketides	Flavonoids	Flavonoid glycosides	4.2708	4.597	4.6263	4.5557	4.5921	4.6852	5.2939	5.4214	5.3797	5.2488	5.2533	5.2667	5.1213	5.0932	5.0954
pos_5105	Genistin	metab_5060	1.9711	5.39e-05	0.866747	Down	C09126	HMDB0033988;LMPK12050166	433.113	pos	M+H	C21H20O10	4.6706	0.0342171	84.9	-	-0.943782	529-59-9	-	-	-	-	-	-	Phenylpropanoids and polyketides	Isoflavonoids	Isoflavonoid O-glycosides	3.8645	4.3749	4.5282	4.2732	4.0891	4.2956	4.8422	4.9759	4.8787	4.8915	4.9199	4.8262	4.7113	4.6816	4.6967
pos_5112	7-Deoxy-13-dihydroadriamycinone	metab_5067	1.6999	0.004552	0.883265	Down	-	-	401.123	pos	M+H	C21H20O8	4.5787	0.0542893	60.5	-	-0.576034	-	-	-	-	-	-	-	-	-	-	4.2769	4.1756	3.8261	4.0393	4.3357	4.9277	4.8787	4.7739	4.8919	4.7413	4.7814	4.895	4.7293	4.6883	4.6899
pos_5138	2,3-dihydroxy-1-(4-hydroxy-3-methoxyphenyl)-propan-1-one	metab_5093	2.0338	1.26e-06	0.881944	Down	-	-	177.054	pos	M+H-2H2O	C10H12O5	4.4333	0.0356756	59.3	-	-0.980163	-	-	-	-	-	-	-	-	-	-	4.731	5.0423	5.0299	5.0577	5.0482	4.8148	5.5483	5.6949	5.5288	5.6414	5.61	5.6793	5.4424	5.4128	5.4205
pos_5199	Isovitexin	metab_5154	1.6692	0.004685	0.891599	Down	C01714	LMPK12110338	433.113	pos	M+H	C21H20O10	4.0358	0.0426919	88.1	-	-0.758384	-	-	-	map00944	Flavone and flavonol biosynthesis	Metabolism	Biosynthesis of other secondary metabolites	-	-	-	4.3845	4.7701	4.8671	4.2592	4.073	4.7713	5.0796	5.3892	5.1348	4.9178	4.9254	4.9763	4.9584	4.9238	4.9304
pos_5283	2-Phenylethyl beta-D-glucopyranoside	metab_5238	1.5415	0.004698	1.11058	UP	-	HMDB0029819	249.112	pos	M+H-2H2O	C14H20O6	3.616	0.0422043	-	58	-1.72744	18997-54-1	-	-	-	-	-	-	Organic oxygen compounds	Organooxygen compounds	Carbohydrates and carbohydrate conjugates	4.7745	4.9528	4.9673	4.7865	4.7499	4.1351	4.2813	4.3922	4.3057	4.1373	4.1763	4.249	4.6577	4.628	4.6249
pos_5324	2-Indanone	metab_5279	1.0358	0.0001335	1.03121	UP	C07727	-	133.065	pos	M+H	C9H8O	3.525	0.0388657	65.1	-	-1.16399	-	-	-	-	-	-	-	-	-	-	5.9585	5.9039	5.9965	6.0061	6.0052	5.9035	5.8152	5.7672	5.8712	5.7115	5.7774	5.7484	5.9215	5.8913	5.894
pos_5401	L-Aspartic acid	metab_5356	1.6014	1.64e-07	1.10404	UP	C00049	HMDB0000191	134.045	pos	M+H	C4H7NO4	3.2889	0.0433323	68.4	-	-1.49677	56-84-8	Peptides;Hormones and transmitters	Amino acids;Neurotransmitters	map01100;map00220;map01110;map00770;map00300;map00760;map01210;map00270;map01200;map00260;map01230;map00460;map00250;map00710;map00970;map00261;map02010;map00410;map00340	Metabolic pathways;Arginine biosynthesis;Biosynthesis of secondary metabolites;Pantothenate and CoA biosynthesis;Lysine biosynthesis;Nicotinate and nicotinamide metabolism;2-Oxocarboxylic acid metabolism;Cysteine and methionine metabolism;Carbon metabolism;Glycine, serine and threonine metabolism;Biosynthesis of amino acids;Cyanoamino acid metabolism;Alanine, aspartate and glutamate metabolism;Ca…	Metabolism;Metabolism;Metabolism;Metabolism;Metabolism;Metabolism;Metabolism;Metabolism;Metabolism;Metabolism;Metabolism;Metabolism;Metabolism;Metabolism;Genetic Information Processing;Metabolism;Environmental Information Processing;Metabolism;Metabolism	Global and overview maps;Amino acid metabolism;Global and overview maps;Metabolism of cofactors and vitamins;Amino acid metabolism;Metabolism of cofactors and vitamins;Global and overview maps;Amino acid metabolism;Global and overview maps;Amino acid metabolism;Global and overview maps;Metabolism of other amino acids;Amino acid metabolism;Energy metabolism;Translation;Biosynthesis of other second…	Organic acids and derivatives	Carboxylic acids and derivatives	Amino acids, peptides, and analogues	4.3636	4.2196	4.2875	4.2495	4.2374	4.3215	3.8047	3.8953	3.8361	3.8613	3.9586	3.9032	4.146	4.1129	4.1146
pos_5415	Hyperoside	metab_5370	1.0257	0.02419	1.05687	UP	C10073	-	528.111	pos	M+ACN+Na	C21H20O12	3.2429	0.0320596	55	-	-0.121504	-	-	-	-	-	-	-	-	-	-	4.6788	5.0845	4.9142	5.1034	5.3403	4.8793	4.697	4.8725	4.674	4.5873	4.7633	4.792	4.9604	4.9356	4.9374
pos_5426	9-Hydroxy-3',4'-dimethoxy-3,4-methylenedioxy-9,9'-epoxylignan	metab_5381	2.5818	7.12e-08	1.24629	UP	-	HMDB0032734	395.145	pos	M+Na	C21H24O6	3.2198	0.0383584	-	56.8	-4.86645	67533-86-2	-	-	-	-	-	-	Lignans, neolignans and related compounds	Furanoid lignans	Tetrahydrofuran lignans	5.28	5.2204	5.2916	5.3039	5.359	5.1882	4.1386	4.3214	4.1804	3.974	4.4739	4.3016	5.0786	5.0489	5.0513
pos_5467	Diphenylhydantoic acid	metab_5422	1.934	1.34e-05	1.14773	UP	-	-	271.107	pos	M+H	C15H14N2O3	3.113	0.0377027	52.9	-	-1.83569	-	-	-	-	-	-	-	-	-	-	4.8944	4.8691	4.6652	4.5863	4.7954	4.5705	4.0312	3.9942	4.3115	4.1794	4.1888	4.0228	4.573	4.5434	4.5466
pos_5468	Nicotyrine	metab_5423	1.9127	9.24e-06	1.1363	UP	C10161	-	159.091	pos	M+H	C10H10N2	3.113	0.0309164	65.7	-	-1.94826	-	-	-	-	-	-	-	-	-	-	5.0826	5.0719	4.8734	4.8188	4.9908	4.7809	4.2729	4.2271	4.5264	4.3909	4.4132	4.2351	4.7774	4.7535	4.7552
pos_5492	CMPF	metab_5447	1.7846	4.43e-06	0.893974	Down	-	-	205.086	pos	M+H-2H2O	C12H16O5	3.0601	0.0280325	52.5	-	-1.64824	-	-	-	-	-	-	-	-	-	-	4.1721	4.4922	4.489	4.3979	4.4047	4.2344	4.8435	4.9146	4.8264	4.8683	4.8815	4.9622	4.7476	4.7259	4.7277
pos_5507	Prenyl-L-cysteine	metab_5462	1.5408	0.00342	1.10094	UP	C06751	-	190.089	pos	M+H	C8H15NO2S	3.0376	0.0359485	67.5	-	-1.87136	-	-	-	-	-	-	-	-	-	-	5.2119	5.103	5.1343	5.1626	5.1376	5.4209	4.8558	4.8486	5.1156	4.5636	4.6289	4.2999	5.0713	5.0416	5.0488
pos_5553	Glycyl-Methionine	metab_5508	2.2078	4.93e-07	0.852221	Down	-	HMDB0028847	270.089	pos	M+ACN+Na	C7H14N2O3S	2.9388	0.0207082	-	51.4	2.82268	-	-	-	-	-	-	-	Organic acids and derivatives	Carboxylic acids and derivatives	Amino acids, peptides, and analogues	4.809	4.6768	4.6355	4.4469	4.5611	4.4139	5.4185	5.3908	5.2449	5.5106	5.4001	5.3544	5.2015	5.1852	5.1869
pos_5619	Licoagroside B	metab_5574	3.8075	2.61e-08	1.81877	UP	-	HMDB0036523	415.123	pos	M+H-H2O	C18H24O12	2.7944	0.0478515	-	59.7	-1.5734	-	-	-	-	-	-	-	Lipids and lipid-like molecules	Saccharolipids	Not Available	5.1957	5.2163	5.1742	4.9788	4.8793	5.0379	2.5053	3.2298	2.5243	2.8592	3.146	2.4952	4.7972	4.7675	4.7576
pos_5631	7-(3,4-dihydroxyphenyl)-1-(4-hydroxy-3-methoxyphenyl)hept-1-ene-3,5-dione	metab_5586	1.0499	0.02472	1.05371	UP	-	HMDB0133442	179.07	pos	M+2H	C20H20O6	2.7792	0.0426172	-	61.4	-1.43466	-	-	-	-	-	-	-	Phenylpropanoids and polyketides	Diarylheptanoids	Linear diarylheptanoids	4.9994	5.1455	5.3439	5.3202	5.27	4.7815	5.0036	4.7283	4.8923	4.9772	4.7885	4.8977	5.0617	5.032	5.0284
pos_5645	6-[2-(2H-1,3-benzodioxol-5-yl)ethyl]-4-methoxyoxan-2-one	metab_5600	1.1916	0.0002848	1.06403	UP	-	HMDB0131686	317.08	pos	M+K	C15H18O5	2.7407	0.0133511	-	65.4	4.63818	-	-	-	-	-	-	-	Organoheterocyclic compounds	Benzodioxoles	Not Available	4.3242	4.562	4.5511	4.4455	4.4859	4.5865	4.268	4.3176	4.2408	4.109	4.1772	4.2205	4.419	4.4084	4.4099
pos_5666	3-(4-hydroxy-2,3,5-trimethoxyphenyl)prop-2-enal	metab_5621	1.3266	2.89e-05	1.06059	UP	-	HMDB0128697	239.091	pos	M+H	C12H14O5	2.6721	0.0304909	-	60.5	-1.40314	-	-	-	-	-	-	-	Benzenoids	Phenols	Methoxyphenols	5.2356	5.0346	5.0406	5.0325	5.0853	5.1666	4.7382	4.7758	4.7818	4.833	4.8824	4.8362	5.0301	5.0065	5.0082
pos_5671	4-Hydroxy-(3',4'-dihydroxyphenyl)-valeric acid	metab_5626	1.1703	0.0007196	1.06228	UP	-	HMDB0041679	209.081	pos	M+H-H2O	C11H14O5	2.6645	0.0317593	-	95	-1.04069	-	-	-	-	-	-	-	Organic acids and derivatives	Hydroxy acids and derivatives	Medium-chain hydroxy acids and derivatives	4.2374	4.2066	4.272	4.4106	4.505	4.3487	4.051	4.1497	4.0676	3.9786	4.1354	4.0748	4.28	4.265	4.2525
pos_5699	Astin I	metab_5654	2.1684	0.0004154	1.19077	UP	C00373	HMDB0041419	516.198	pos	M+H-2H2O	C25H34ClN5O7	2.6111	0.0298784	-	76.9	-5.89827	161162-22-7	-	-	-	-	-	-	Organic acids and derivatives	Peptidomimetics	Hybrid peptides	5.4583	5.5299	5.155	5.1904	5.3732	4.5553	4.3168	4.5861	4.5951	4.2097	4.1922	4.3538	5.1145	5.0914	5.0931
pos_5771	6E-Octene-2,4-diynoic acid	metab_5726	1.0144	0.01886	1.06343	UP	-	LMFA01030743	135.044	pos	M+H	C8H6O2	2.5129	0.0429822	78.1	-	-1.63779	-	-	-	-	-	-	-	-	-	-	3.8498	4.264	4.3178	4.146	4.139	3.8246	3.8427	3.798	3.7878	3.8509	3.8763	3.9216	4.0184	3.9857	3.9874
pos_5773	3-Fucosyllactose	metab_5728	1.1559	0.03946	1.0745	UP	-	HMDB0002094	527.137	pos	M+K	C18H32O15	2.5042	0.0465756	-	63.3	-0.674593	41312-47-4	-	-	-	-	-	-	Organic oxygen compounds	Organooxygen compounds	Carbohydrates and carbohydrate conjugates	4.6692	5.2272	5.3077	5.1141	5.1063	4.4722	4.5601	4.5299	4.4861	4.75	4.7032	4.7945	4.9522	4.9133	4.9242
pos_5781	{[(4E)-5-(4-methoxyphenyl)-3-oxopent-4-en-2-yl]oxy}sulfonic acid	metab_5736	1.7754	0.0008786	1.14256	UP	-	HMDB0132992	328.085	pos	M+ACN+H	C12H14O6S	2.489	0.0422663	-	76.4	-1.17152	-	-	-	-	-	-	-	Benzenoids	Phenol ethers	Anisoles	4.854	4.4585	4.564	4.532	4.4141	4.113	3.7596	4.2543	3.9188	3.8594	3.9054	3.8773	4.4194	4.386	4.3903
pos_5801	Aspartyl-L-proline	metab_5756	2.717	3.38e-07	0.770828	Down	-	HMDB0002335	499.142	pos	2M+K	C9H14N2O5	2.4511	0.0349974	-	51	-3.77571	42155-95-3	-	-	-	-	-	-	Organic acids and derivatives	Carboxylic acids and derivatives	Amino acids, peptides, and analogues	4.5323	4.0729	3.9576	3.966	4.0211	3.9164	5.238	5.4	5.4333	5.2753	5.1857	5.208	5.0742	5.0444	5.0655
pos_5806	L-Tyrosine, 3-methoxy-a-methyl-, hydrogen sulfate	metab_5761	2.0187	0.0001311	0.846768	Down	-	-	306.064	pos	M+H	C11H15NO7S	2.4434	0.0100877	55	-	-1.1256	-	-	-	-	-	-	-	-	-	-	3.8429	4.2903	3.957	3.8866	4.1384	3.5081	4.6251	4.8321	4.4915	4.6647	4.6724	4.6124	4.4708	4.4625	4.4642
pos_5865	Pyrocatechol	metab_5820	1.4969	2.38e-06	0.918857	Down	C00090;C15571	HMDB0000957	111.044	pos	M+H	C6H6O2	2.3276	0.0346868	59.7	-	0.810099	120-80-9	-	-	map01100	Metabolic pathways	Metabolism	Global and overview maps	Benzenoids	Phenols	Benzenediols	4.0318	4.1006	4.0786	3.9661	3.9765	4.1986	4.3808	4.402	4.4002	4.4341	4.4222	4.4634	4.3038	4.2742	4.2847
pos_5870	Tenuazonic acid	metab_5825	1.7552	0.001056	1.12253	UP	C08511	HMDB0036074	198.112	pos	M+H	C10H15NO3	2.32	0.0377707	59.6	-	-0.659956	610-88-8	-	-	-	-	-	-	Organoheterocyclic compounds	Pyrrolines	Not Available	5.04	4.7939	4.9315	5.2453	5.2513	4.8041	4.2285	4.2971	4.4015	4.4442	4.8021	4.6108	4.8846	4.8549	4.8584
pos_5873	L-Isoleucine	metab_5828	1.5911	0.0005747	1.08826	UP	C00407	HMDB0000172	132.102	pos	M+H	C6H13NO2	2.32	0.0507247	53.8	-	-1.45965	73-32-5	Peptides	Amino acids	map01100;map01110;map00280;map00290;map01210;map00960;map02010;map01230;map00966;map00460;map00970	Metabolic pathways;Biosynthesis of secondary metabolites;Valine, leucine and isoleucine degradation;Valine, leucine and isoleucine biosynthesis;2-Oxocarboxylic acid metabolism;Tropane, piperidine and pyridine alkaloid biosynthesis;ABC transporters;Biosynthesis of amino acids;Glucosinolate biosynthesis;Cyanoamino acid metabolism;Aminoacyl-tRNA biosynthesis	Metabolism;Metabolism;Metabolism;Metabolism;Metabolism;Metabolism;Environmental Information Processing;Metabolism;Metabolism;Metabolism;Genetic Information Processing	Global and overview maps;Global and overview maps;Amino acid metabolism;Amino acid metabolism;Global and overview maps;Biosynthesis of other secondary metabolites;Membrane transport;Global and overview maps;Biosynthesis of other secondary metabolites;Metabolism of other amino acids;Translation	Organic acids and derivatives	Carboxylic acids and derivatives	Amino acids, peptides, and analogues	5.4756	5.2649	5.3797	5.619	5.6377	5.2975	4.8579	4.9047	4.9139	4.9853	5.2484	5.1143	5.3312	5.2927	5.2944
pos_5908	N-[1-(4-methoxy-6-oxopyran-2-yl)-2-methylbutyl]acetamide	metab_5862	2.7233	0.0001476	0.720528	Down	-	-	236.128	pos	M+H-H2O	C13H19NO4	2.2546	0.0697517	51.7	-	-1.63525	-	-	-	-	-	-	-	-	-	-	4.1612	3.8236	2.9428	3.4083	3.6874	2.7413	4.8684	4.8201	4.5551	4.9223	4.8177	4.835	4.5564	4.4957	4.5282
pos_5915	N-Tigloylglycine	metab_5869	1.0968	7.82e-05	1.04592	UP	-	-	332.181	pos	2M+NH4	C7H11NO3	2.2471	0.0328125	70.4	-	-1.56693	-	-	-	-	-	-	-	-	-	-	4.6481	4.6659	4.6434	4.7819	4.7782	4.7215	4.478	4.5319	4.5134	4.4196	4.5549	4.5015	4.6591	4.6416	4.631
pos_5917	3-Methoxy-4,5-methylenedioxycinnamaldehyde	metab_5871	1.5706	0.0002663	0.915121	Down	-	HMDB0035303	207.065	pos	M+H	C11H10O4	2.2471	0.0416234	58.5	-	-3.30634	74683-19-5	-	-	-	-	-	-	Organoheterocyclic compounds	Benzodioxoles	Not Available	4.3116	4.5234	4.5034	4.8032	4.7513	4.7218	5.0293	4.9859	5.004	5.0579	5.0469	5.052	4.8882	4.855	4.8602
pos_5937	Serotonin	metab_5890	1.414	0.0003764	1.05852	UP	C00780	HMDB0000259	159.091	pos	M+H-H2O	C10H12N2O	2.2177	0.0376505	72.9	-	-1.89562	50-67-9	Peptides;Hormones and transmitters	Amines;Neurotransmitters	map01100;map00380	Metabolic pathways;Tryptophan metabolism	Metabolism;Metabolism	Global and overview maps;Amino acid metabolism	Organoheterocyclic compounds	Indoles and derivatives	Tryptamines and derivatives	6.4819	6.5514	6.4213	6.2806	6.4065	6.2421	5.9437	5.8585	6.0844	6.1209	6.1017	6.1526	6.3157	6.287	6.2884
pos_5938	4-formyl Indole	metab_5891	1.413	0.0003887	1.05515	UP	-	-	146.06	pos	M+H	C9H7NO	2.2177	0.040098	99.4	-	-2.56947	-	-	-	-	-	-	-	-	-	-	6.8527	6.9274	6.7902	6.6481	6.7718	6.6128	6.3151	6.2299	6.4499	6.4891	6.4735	6.5233	6.6863	6.6556	6.6573
pos_5939	Tryptophanol	metab_5892	1.4075	0.0005305	1.05753	UP	C00955	HMDB0003447	144.08	pos	M+H-H2O	C10H11NO	2.2177	0.0399838	56.3	-	-1.74101	526-55-6	-	-	map00380	Tryptophan metabolism	Metabolism	Amino acid metabolism	Organoheterocyclic compounds	Indoles and derivatives	Indoles	6.6073	6.6949	6.5478	6.392	6.5329	6.3625	6.0636	5.9802	6.2051	6.2447	6.2366	6.2782	6.4406	6.4101	6.4118
pos_5960	Furfural	metab_5913	1.7815	0.0006375	1.13669	UP	C14279	-	97.0287	pos	M+H	C5H4O2	2.1885	0.0340806	55.7	-	3.49202	-	-	-	-	-	-	-	-	-	-	5.1773	4.7836	4.6925	4.5958	4.5766	5.0259	4.1992	4.5055	4.2695	4.0865	4.2486	4.073	4.7214	4.6952	4.6969
pos_6044	Urolithin A-8-O-glucuronide	metab_5997	2.4234	7.51e-07	1.24661	UP	-	HMDB0060022	446.111	pos	M+ACN+H	C19H16O10	2.0589	0.0371774	-	72.6	7.49547	-	-	-	-	-	-	-	Organic oxygen compounds	Organooxygen compounds	Carbohydrates and carbohydrate conjugates	4.6938	4.7463	4.8058	4.7749	4.8231	5.0921	3.8534	3.9927	4.0539	3.6041	3.9379	3.7698	4.627	4.5996	4.599
pos_6046	Syringic acid	metab_5999	1.8493	2.55e-07	0.884977	Down	C10833	HMDB0002085	199.06	pos	M+H	C9H10O5	2.0589	0.0366563	62.7	-	-1.42152	530-57-4	-	-	-	-	-	-	Benzenoids	Benzene and substituted derivatives	Benzoic acids and derivatives	4.163	4.2669	4.2511	4.1116	4.0698	4.2298	4.7709	4.7598	4.8281	4.6612	4.6294	4.7041	4.5717	4.5451	4.5437
pos_6047	2,6-Dimethoxyphenol	metab_6000	1.7157	3.28e-07	0.888382	Down	C10787	HMDB0034158	155.07	pos	M+H	C8H10O3	2.0589	0.0268075	63.4	-	-1.88488	91-10-1	-	-	-	-	-	-	Benzenoids	Phenols	Methoxyphenols	3.7242	3.8075	3.8355	3.6567	3.6653	3.7612	4.2524	4.216	4.3113	4.1708	4.1307	4.1899	4.0475	4.0266	4.0284
pos_6085	Kaempferol 3-O-arabinoside	metab_6038	1.034	0.01314	1.0503	UP	-	HMDB0029261	460.127	pos	M+ACN+H	C20H18O10	2.0042	0.0336295	-	67.4	7.62605	-	-	-	-	-	-	-	Phenylpropanoids and polyketides	Flavonoids	Flavonoid glycosides	4.8322	4.5971	4.5969	4.4749	4.4205	4.3359	4.3625	4.3238	4.3083	4.2763	4.3527	4.3285	4.4774	4.4565	4.4495
pos_6107	N5-(4-Methoxybenzyl)glutamine	metab_6060	1.8984	0.003047	1.16873	UP	-	HMDB0033598	267.134	pos	M+H	C13H18N2O4	1.9659	0.033299	63.5	-	-1.23983	-	-	-	-	-	-	-	Organic acids and derivatives	Carboxylic acids and derivatives	Amino acids, peptides, and analogues	5.3256	4.9037	4.9233	4.4728	4.458	5.3192	4.0498	3.932	4.0227	4.2403	4.4898	4.4231	4.8128	4.7931	4.7848
pos_6111	6-(acetyloxy)-3,4,5-trihydroxyoxane-2-carboxylic acid	metab_6064	1.8321	0.00441	0.832018	Down	-	HMDB0124934	219.05	pos	M+H-H2O	C8H12O8	1.9582	0.0327391	-	80.3	-0.258293	-	-	-	-	-	-	-	Organic oxygen compounds	Organooxygen compounds	Carbohydrates and carbohydrate conjugates	3.225	3.8486	3.3102	3.5726	3.5758	2.8946	3.6446	4.6359	4.0638	4.0151	4.1176	4.0739	4.1188	4.0923	4.1151
pos_6138	Cyanidin 3-(6''-acetyl-galactoside)	metab_6091	1.4694	0.0009768	0.917619	Down	-	HMDB0029236	474.118	pos	M+H-H2O	C23H23O12+	1.9186	0.0467988	-	54.9	4.16918	350602-26-5	-	-	-	-	-	-	Phenylpropanoids and polyketides	Flavonoids	Flavonoid glycosides	4.253	4.2644	4.0274	4.175	4.1391	4.3725	4.7345	4.6508	4.4355	4.5909	4.3442	4.7407	4.5751	4.5455	4.5368
pos_6163	Cis-Zeatin 9-glucoside	metab_6116	2.6093	0.0003659	0.759954	Down	-	HMDB0041369	382.172	pos	M+H	C16H23N5O6	1.8803	0.0424415	53.2	-	-0.296114	169565-72-4	-	-	-	-	-	-	Organic oxygen compounds	Organooxygen compounds	Carbohydrates and carbohydrate conjugates	3.4589	3.7257	3.5543	4.0792	4.2606	3.7431	5.0952	5.8945	4.94	4.6585	4.7552	4.6871	5.022	4.9923	4.9889
pos_6170	Cystathionine sulfoxide	metab_6123	2.8294	0.0004604	1.42453	UP	-	HMDB0002399	261.054	pos	M+Na	C7H14N2O5S	1.8727	0.0325276	-	55.1	8.7873	54927-81-0	-	-	-	-	-	-	Organic acids and derivatives	Carboxylic acids and derivatives	Amino acids, peptides, and analogues	4.9874	4.7911	4.8348	4.382	4.4634	5.3565	3.6272	3.8486	3.52	2.364	3.8733	2.9947	4.6523	4.6353	4.6244
pos_6202	HMBOA-Glc	metab_6155	1.7145	0.001029	1.11285	UP	-	HMDB0037263	380.094	pos	M+Na	C15H19NO9	1.803	0.0367878	-	60.5	-2.64474	17622-26-3	-	-	-	-	-	-	Organic oxygen compounds	Organooxygen compounds	Carbohydrates and carbohydrate conjugates	5.4227	5.2048	5.3519	5.2412	5.2686	5.5035	4.9176	4.98	5.0682	4.5827	4.8333	4.3667	5.2434	5.2138	5.219
pos_6267	Indole-3-carboxaldehyde	metab_6220	1.5263	0.0002871	1.07576	UP	C00294;C08493	-	146.06	pos	M+H	C9H7NO	1.6873	0.0365944	86.7	-	-1.61285	-	-	-	map01100;map00230	Metabolic pathways;Purine metabolism	Metabolism;Metabolism	Global and overview maps;Nucleotide metabolism	-	-	-	5.9506	5.6338	5.5945	5.5642	5.6598	5.6812	5.3264	5.3801	5.3888	5.1314	5.3143	5.1426	5.5829	5.5532	5.5589
pos_6338	Erinapyrone B	metab_6291	1.4218	0.0001439	1.07632	UP	-	HMDB0041427	184.097	pos	M+ACN+H	C7H10O3	1.5368	0.0365365	-	56.5	-1.83613	146064-67-7	-	-	-	-	-	-	Organoheterocyclic compounds	Pyrans	Pyranones and derivatives	4.9696	4.7031	4.7339	4.9018	4.8898	4.9864	4.4889	4.5655	4.6113	4.4294	4.5823	4.4377	4.7604	4.7341	4.7324
pos_6414	Cysteineglutathione disulfide	metab_6367	1.9216	7.68e-06	1.12917	UP	-	HMDB0000656	409.084	pos	M+H-H2O	C13H22N4O8S2	1.3821	0.0372699	-	71.7	-0.748261	13081-14-6	-	-	-	-	-	-	Organic acids and derivatives	Carboxylic acids and derivatives	Amino acids, peptides, and analogues	5.3465	5.2014	5.2315	5.2978	5.3547	5.6074	4.7762	4.7376	4.8317	4.5978	4.8244	4.6064	5.2036	5.1761	5.1756
pos_6424	2'-O-Methyladenosine	metab_6377	1.795	2.87e-06	0.893294	Down	C04779	HMDB0004326	282.119	pos	M+H	C11H15N5O4	1.3746	0.0429471	76.1	-	-0.901461	2140-79-6	-	-	-	-	-	-	Nucleosides, nucleotides, and analogues	Purine nucleosides	Not Available	4.3778	4.5819	4.3231	4.384	4.4788	4.2272	4.8813	4.9609	4.8476	4.9	4.9152	5.0181	4.8014	4.7665	4.7734
pos_6451	4-hydroxy-3,5,6-trimethylpyran-2-one	metab_6404	1.0459	0.0004261	0.964648	Down	-	-	137.06	pos	M+H-H2O	C8H10O3	1.2822	0.0381432	57.2	-	-1.11188	-	-	-	-	-	-	-	-	-	-	4.9909	5.1726	5.1995	5.1631	5.2383	5.1677	5.3258	5.3983	5.3437	5.3353	5.3215	5.3411	5.2951	5.266	5.2674
pos_6476	Adenylosuccinate	metab_6429	1.5826	0.0002605	0.923853	Down	C03794	-	464.081	pos	M+H	C14H18N5O11P	1.1974	0.0336347	50.8	-	-0.426858	-	-	-	map01100;map00250;map00230	Metabolic pathways;Alanine, aspartate and glutamate metabolism;Purine metabolism	Metabolism;Metabolism;Metabolism	Global and overview maps;Amino acid metabolism;Nucleotide metabolism	-	-	-	5.0777	5.1848	5.0552	5.1845	5.112	5.2774	5.5409	5.5577	5.3821	5.6141	5.465	5.878	5.4365	5.4106	5.4123
pos_6489	Triglochinin	metab_6442	1.9755	0.0003368	1.17221	UP	C08342	HMDB0030934	423.1	pos	M+ACN+Na	C14H17NO10	1.167	0.043371	-	87.1	-3.57295	28876-11-1	-	-	-	-	-	-	Organic oxygen compounds	Organooxygen compounds	Carbohydrates and carbohydrate conjugates	4.6106	4.5654	4.6588	4.8048	4.9318	5.1026	3.6819	3.9206	4.1546	4.0792	4.3728	4.2524	4.6947	4.6651	4.6604
pos_6536	Hypoxanthine	metab_6489	2.2131	3.38e-06	0.855134	Down	C00262	HMDB0000157	137.046	pos	M+H	C5H4N4O	1.0697	0.0180571	88.5	-	-1.99808	68-94-0	-	-	map01100;map00230	Metabolic pathways;Purine metabolism	Metabolism;Metabolism	Global and overview maps;Nucleotide metabolism	Organoheterocyclic compounds	Imidazopyrimidines	Purines and purine derivatives	4.8462	4.7535	4.5184	4.623	4.5719	4.8853	5.5407	5.4202	5.3651	5.4109	5.4641	5.7743	5.3376	5.3233	5.325
pos_6546	[2-hydroxy-5-(2-hydroxy-3-methoxy-3-oxopropyl)phenyl]oxidanesulfonic acid	metab_6499	1.029	0.02031	1.04469	UP	-	HMDB0124954	310.059	pos	M+NH4	C10H12O8S	1.0546	0.0366636	-	59.8	-1.73332	-	-	-	-	-	-	-	Organic acids and derivatives	Organic sulfuric acids and derivatives	Arylsulfates	5.4618	5.6917	5.714	5.7845	5.7352	5.369	5.4139	5.4327	5.5949	5.2984	5.3656	5.2068	5.553	5.5265	5.525
pos_6556	3alpha,4,7,7alpha-Tetrahydro-4-hydroxy-1H-isoindole-1,3(2H)-dione	metab_6509	1.6744	3.32e-08	1.10217	UP	-	HMDB0034889	168.065	pos	M+H	C8H9NO3	1.0472	0.0410084	62.9	-	-2.26938	-	-	-	-	-	-	-	Organoheterocyclic compounds	Isoindoles and derivatives	Isoindolines	4.7274	4.7415	4.7836	4.6529	4.6989	4.6674	4.2456	4.2461	4.2699	4.2386	4.3762	4.2745	4.5885	4.556	4.5605
pos_6557	Guanine	metab_6510	1.0287	0.01356	0.964925	Down	C00242	HMDB0000132	152.056	pos	M+H	C5H5N5O	1.0472	0.0366908	89.5	-	-2.00901	73-40-5	Nucleic acids	Bases	map01100;map00230	Metabolic pathways;Purine metabolism	Metabolism;Metabolism	Global and overview maps;Nucleotide metabolism	Organoheterocyclic compounds	Imidazopyrimidines	Purines and purine derivatives	6.6335	6.5371	6.3273	6.2888	6.2364	6.6453	6.6979	6.6179	6.6138	6.6871	6.6793	6.778	6.6185	6.5904	6.5919
pos_6564	S-Lactoylglutathione	metab_6517	1.6176	0.0002602	1.09634	UP	C03451	HMDB0001066	380.112	pos	M+H	C13H21N3O8S	1.0178	0.0131192	-	61.2	-1.71727	25138-66-3	-	-	map00620	Pyruvate metabolism	Metabolism	Carbohydrate metabolism	Organic acids and derivatives	Carboxylic acids and derivatives	Amino acids, peptides, and analogues	5.1509	4.7936	4.9512	5.0176	4.9187	4.8473	4.576	4.5294	4.681	4.3393	4.6149	4.3306	4.8299	4.8194	4.8209
pos_6573	Piperidine	metab_6526	1.3409	0.002127	1.04676	UP	C01746	HMDB0034301	86.0967	pos	M+H	C5H11N	1.0104	0.0393839	56.4	-	2.98495	110-89-4	-	-	map00960	Tropane, piperidine and pyridine alkaloid biosynthesis	Metabolism	Biosynthesis of other secondary metabolites	Organoheterocyclic compounds	Piperidines	Not Available	7.4707	7.3202	7.4551	7.584	7.5854	7.357	6.9635	6.9763	7.0227	7.1787	7.3503	7.2807	7.4021	7.3725	7.3733
pos_6655	5'-O-beta-D-Glucosylpyridoxine	metab_6607	1.2949	3.23e-07	1.04327	UP	C03996	-	332.134	pos	M+H	C14H21NO8	0.9065	0.0378861	86.8	-	-1.24902	-	-	-	-	-	-	-	-	-	-	6.3826	6.3454	6.3906	6.3056	6.2849	6.2791	6.0537	6.0901	6.0732	6.0404	6.1013	6.0541	6.272	6.2437	6.244
pos_6690	Thioacetamide	metab_6641	1.4934	0.001133	1.09023	UP	C19302	-	76.022	pos	M+H	C2H5NS	0.9065	0.0456193	88.6	-	6.05688	-	-	-	-	-	-	-	-	-	-	4.9643	4.8064	5.0087	4.9314	4.8953	4.9618	4.657	4.6079	4.7756	4.3701	4.5167	4.1934	4.8257	4.7879	4.7977
pos_6879	Thiazolidine-4-carboxylic acid	metab_6830	1.3795	0.004791	1.06543	UP	-	-	134.027	pos	M+H	C4H7NO2S	0.6293	0.0368157	58.9	-	-1.90166	-	-	-	-	-	-	-	-	-	-	6.1309	6.0309	6.1722	6.297	6.3335	6.5354	5.7269	5.5974	6.0698	5.8045	6.0643	5.9342	6.14	6.1103	6.1156
pos_6891	N2-Acetyl-L-ornithine	metab_6841	1.9576	0.0002624	1.13938	UP	C00437	-	175.107	pos	M+H	C7H14N2O3	0.6219	0.0397257	58	-	-1.91632	-	-	-	map01100;map01210;map00220;map01110;map01230	Metabolic pathways;2-Oxocarboxylic acid metabolism;Arginine biosynthesis;Biosynthesis of secondary metabolites;Biosynthesis of amino acids	Metabolism;Metabolism;Metabolism;Metabolism;Metabolism	Global and overview maps;Global and overview maps;Amino acid metabolism;Global and overview maps;Global and overview maps	-	-	-	5.5487	5.7339	5.8776	5.6943	5.7786	6.3959	5.0146	4.9799	5.0578	5.2038	5.2788	5.2089	5.7273	5.6965	5.699
pos_6933	N-Acetyl-L-Histidine	metab_6883	1.6843	0.0009658	0.902228	Down	C02997	-	198.087	pos	M+H	C8H11N3O3	0.5925	0.0366294	92.2	-	-2.01751	-	-	-	-	-	-	-	-	-	-	5.292	4.858	4.8934	4.7014	4.6693	5.2637	5.5231	5.5867	5.5645	5.4306	5.3761	5.4129	5.336	5.3096	5.308
pos_6936	Trigonelline	metab_6886	1.2119	0.000455	1.04023	UP	C01004	HMDB0000875	138.055	pos	M+H	C7H7NO2	0.5925	0.0348851	74.5	-	-2.20091	535-83-1	-	-	map00760	Nicotinate and nicotinamide metabolism	Metabolism	Metabolism of cofactors and vitamins	Alkaloids and derivatives	Not Available	Not Available	7.0218	7.0733	7.1198	6.9355	6.8852	7.2193	6.7407	6.6986	6.8173	6.7924	6.8094	6.7625	6.9695	6.9397	6.9506
pos_6941	Liquiritigenin 4'-[3-acetylapiosyl-(1->2)-glucoside]	metab_6891	1.6908	5.16e-06	0.930562	Down	-	HMDB0035444;LMPK12140026	610.218	pos	M+NH4	C28H32O14	0.5853	0.0391259	-	61.6	8.7112	226946-10-7	-	-	-	-	-	-	Phenylpropanoids and polyketides	Flavonoids	Flavonoid glycosides	5.9676	6.2272	6.2858	6.2352	6.2399	6.1578	6.6282	6.6155	6.5626	6.6794	6.6626	6.7346	6.5183	6.4886	6.4898
pos_6942	(Z)-Resveratrol 3,4'-diglucoside	metab_6892	1.8406	2.43e-06	0.920493	Down	-	HMDB0039910	594.223	pos	M+ACN+H	C26H32O13	0.5853	0.0379569	-	76	9.34304	-	-	-	-	-	-	-	Phenylpropanoids and polyketides	Stilbenes	Stilbene glycosides	6.1061	6.4273	6.4381	6.3035	6.3104	6.2338	6.7911	6.8181	6.7795	6.9012	6.8554	6.9405	6.6619	6.6317	6.636
pos_6950	Creatine	metab_6900	1.0548	0.002624	0.953309	Down	C00300	HMDB0000064	132.076	pos	M+H	C4H9N3O2	0.5853	0.0511325	56.8	-	-2.30168	57-00-1	-	-	map01100;map00330;map00260	Metabolic pathways;Arginine and proline metabolism;Glycine, serine and threonine metabolism	Metabolism;Metabolism;Metabolism	Global and overview maps;Amino acid metabolism;Amino acid metabolism	Organic acids and derivatives	Carboxylic acids and derivatives	Amino acids, peptides, and analogues	4.716	4.7057	4.7933	4.5445	4.5303	4.6003	4.7163	4.8344	4.8698	4.9623	4.9215	4.9518	5.1626	5.1939	5.2061
pos_6972	Saccharopine	metab_6921	1.2125	0.02419	1.0628	UP	C00449	HMDB0000279	277.139	pos	M+H	C11H20N2O6	0.5706	0.0408185	83.2	-	-1.96547	997-68-2	-	-	map01100;map00310;map01110;map00300;map01230	Metabolic pathways;Lysine degradation;Biosynthesis of secondary metabolites;Lysine biosynthesis;Biosynthesis of amino acids	Metabolism;Metabolism;Metabolism;Metabolism;Metabolism	Global and overview maps;Amino acid metabolism;Global and overview maps;Amino acid metabolism;Global and overview maps	Organic acids and derivatives	Carboxylic acids and derivatives	Amino acids, peptides, and analogues	6.2153	5.742	5.6972	5.5044	5.7576	6.1211	5.3545	5.5802	5.321	5.3651	5.6887	5.6579	5.8155	5.7858	5.7845
pos_6973	Glycerophosphocholine	metab_6922	1.8872	0.0006881	0.898674	Down	C00670	HMDB0000086	258.11	pos	M+H	C8H20NO6P	0.5706	0.0397474	70.4	-	-1.90197	28319-77-9	-	-	map00565;map00564	Ether lipid metabolism;Glycerophospholipid metabolism	Metabolism;Metabolism	Lipid metabolism;Lipid metabolism	Lipids and lipid-like molecules	Glycerophospholipids	Glycerophosphocholines	5.7849	5.939	5.7544	5.5694	5.6901	5.6249	5.9837	6.6605	6.1698	6.3528	6.2889	6.7814	6.2679	6.2382	6.2384
pos_7065	Lysinoalanine	metab_7012	1.4388	0.001451	0.918787	Down	-	HMDB0029447	198.123	pos	M+H-2H2O	C9H19N3O4	0.5127	0.0347256	-	65.1	-1.84121	18810-04-3	-	-	-	-	-	-	Organic acids and derivatives	Carboxylic acids and derivatives	Amino acids, peptides, and analogues	4.34	4.6329	4.6998	4.5496	4.4798	4.1454	4.8157	4.8383	4.8147	5.0178	4.7907	4.9434	4.7521	4.7225	4.7333
pos_7101	Threoninyl-Methionine	metab_7046	1.0983	0.006769	1.04965	UP	-	HMDB0029067	215.087	pos	M+H-2H2O	C9H18N2O4S	0.498	0.0419069	-	67.9	9.5719	-	-	-	-	-	-	-	Organic acids and derivatives	Carboxylic acids and derivatives	Amino acids, peptides, and analogues	5.6131	5.5535	5.5881	5.4808	5.562	6.0068	5.3788	5.3204	5.3846	5.3476	5.4308	5.3431	5.6341	5.5994	5.608
pos_7107	D-Pipecolic acid	metab_7051	1.168	0.00187	1.04266	UP	-	HMDB0005960	130.086	pos	M+H	C6H11NO2	0.498	0.0462801	93.1	-	-1.55649	1723-00-8	-	-	-	-	-	-	Organic acids and derivatives	Carboxylic acids and derivatives	Amino acids, peptides, and analogues	6.7124	6.6643	6.6548	6.5808	6.6712	7.029	6.4374	6.4213	6.4798	6.4151	6.4851	6.4243	6.6761	6.6409	6.6426
pos_7124	Pyrimidine	metab_7067	1.2307	0.0002088	0.937406	Down	C00396	HMDB0003361	81.0452	pos	M+H	C4H4N2	0.4905	0.045218	74.8	-	5.97371	25247-63-6	-	-	-	-	-	-	Organoheterocyclic compounds	Diazines	Pyrimidines and pyrimidine derivatives	4.0722	4.2148	4.0998	4.1337	4.145	3.9055	4.3457	4.3926	4.4677	4.359	4.3187	4.328	4.2435	4.2061	4.2155
neg_9	Gamma-Glu-Leu	metab_7161	1.6357	0.0009207	1.08695	UP	-	-	259.129	neg	M-H, M+K-2H, M+Na-2H, M-H2O-H	C11H20N2O5	2.3182	0.022751	73.7	-	-1.72843	-	-	-	-	-	-	-	-	-	-	6.5126	6.2479	6.4189	6.6633	6.6507	6.2224	5.6835	5.8119	5.866	5.9514	6.2214	6.0845	6.3418	6.3227	6.3284
neg_16	Raffinose	metab_7168	1.631	2.07e-05	0.935205	Down	C00492	HMDB0003213	503.161	neg	M+FA-H, 2M-H, M-H	C18H32O16	0.5837	0.0264205	69.6	-	-1.75113	512-69-6	-	-	map02010;map00052	ABC transporters;Galactose metabolism	Environmental Information Processing;Metabolism	Membrane transport;Carbohydrate metabolism	Organic oxygen compounds	Organooxygen compounds	Carbohydrates and carbohydrate conjugates	7.0809	7.2851	7.2846	7.2239	7.1248	6.8862	7.6392	7.6726	7.6783	7.6564	7.5383	7.672	7.5	7.4793	7.4815
neg_32	Glutamylvaline	metab_7184	1.3375	8.86e-05	1.05868	UP	-	HMDB0028832	245.114	neg	M-H, M+Na-2H, M-H2O-H	C10H18N2O5	1.534	0.0194407	-	60.2	-1.97737	5879-06-1	-	-	-	-	-	-	Organic acids and derivatives	Carboxylic acids and derivatives	Amino acids, peptides, and analogues	6.1025	5.8292	5.9061	6.0222	6.0219	6.0874	5.6105	5.701	5.7706	5.5926	5.7023	5.5987	5.9134	5.8968	5.9027
neg_42	2-Feruloyl-1,2'-disinapoylgentiobiose	metab_7194	1.2253	0.003537	1.05212	UP	-	HMDB0030336	929.272	neg	M-H, M+Na-2H, M+Cl	C44H50O22	5.4202	0.0136835	-	86.6	-0.035939	-	-	-	-	-	-	-	Phenylpropanoids and polyketides	Cinnamic acids and derivatives	Hydroxycinnamic acids and derivatives	6.7259	6.5697	6.8607	6.4703	6.3281	6.7473	6.2314	6.2907	6.2752	6.3598	6.3898	6.1884	6.5244	6.5125	6.518
neg_69	Glycerol trisinapate	metab_7221	1.1833	0.01627	0.942207	Down	-	HMDB0036353	709.22	neg	M-H, M+FA-H, M+Cl	C36H38O15	3.135	0.0299871	-	55.1	8.3297	-	-	-	-	-	-	-	Lipids and lipid-like molecules	Glycerolipids	Triradylcglycerols	5.81	6.1827	6.122	6.2074	6.1066	5.4316	6.2602	6.4212	6.3219	6.3674	6.2669	6.4223	6.2515	6.2269	6.2323
neg_216	Ribose 1-phosphate	metab_7367	1.033	0.000716	0.960778	Down	C00620	HMDB0001489	229.011	neg	M-H, M+FA-H	C5H11O8P	0.5837	0.0224613	51.3	-	-3.72243	14075-00-4	-	-	map00030;map00230	Pentose phosphate pathway;Purine metabolism	Metabolism;Metabolism	Carbohydrate metabolism;Nucleotide metabolism	Organic oxygen compounds	Organooxygen compounds	Carbohydrates and carbohydrate conjugates	5.5101	5.6864	5.6103	5.4913	5.5001	5.4407	5.7575	5.7581	5.8885	5.7176	5.7926	5.6815	5.6811	5.6622	5.6677
neg_217	D-Glucarate	metab_7368	1.6053	0.0001185	0.93519	Down	C00818	-	209.029	neg	M-H, 2M-H	C6H10O8	0.5987	0.0222552	78.4	-	-5.33777	-	-	-	map01100;map00053	Metabolic pathways;Ascorbate and aldarate metabolism	Metabolism;Metabolism	Global and overview maps;Carbohydrate metabolism	-	-	-	7.2072	7.3605	7.5126	7.5279	7.5253	7.04	7.8574	7.8951	7.9269	7.882	7.8481	7.8253	7.7536	7.7349	7.7404
neg_523	Prostaglandin D1 Alcohol	metab_7674	1.5756	1.93e-05	0.912663	Down	-	-	339.253	neg	M-H, M+FA-H	C20H36O4	6.2465	0.0346753	54.3	-	-2.21607	-	-	-	-	-	-	-	-	-	-	4.6632	4.8135	4.9741	4.9369	4.9886	4.7361	5.2037	5.2942	5.3415	5.4052	5.3282	5.3255	5.1814	5.1608	5.1522
neg_640	N-Acetylserotonin sulfate	metab_7791	1.7417	0.0008725	1.13977	UP	-	HMDB0060834	297.054	neg	M-H2O-H, M-H	C12H14N2O5S	2.3182	0.0239631	-	59.1	-2.21777	94840-68-3	-	-	-	-	-	-	Organic acids and derivatives	Carboxylic acids and derivatives	Carboxylic acid derivatives	4.8533	4.5429	4.7101	5.0023	5.0328	4.5458	3.9298	4.0379	4.1016	4.2117	4.5107	4.3775	4.6431	4.6225	4.6358
neg_657	Berberrubine	metab_7808	1.3203	7.35e-05	1.06878	UP	-	HMDB0030266	359.055	neg	M+Na-2H, M+K-2H	C19H16NO4+	2.4846	0.0182648	-	67	-2.72781	17388-19-1	-	-	-	-	-	-	Alkaloids and derivatives	Protoberberine alkaloids and derivatives	Not Available	5.1002	4.9135	4.9005	4.9616	5.0031	5.0772	4.6367	4.7002	4.7994	4.5783	4.7355	4.5782	4.8769	4.8656	4.8617
neg_660	6-Caffeoylsucrose	metab_7811	1.2823	0.0201	1.07376	UP	-	HMDB0035486	503.14	neg	M-H, M+Cl	C21H28O14	2.5081	0.0267301	-	64.4	-0.336953	-	-	-	-	-	-	-	Lipids and lipid-like molecules	Steroids and steroid derivatives	Steroidal glycosides	5.6661	6.2598	6.3474	6.1668	6.1055	5.494	5.4858	5.5052	5.4618	5.714	5.6652	5.732	5.9229	5.9023	5.9038
neg_802	Allysine	metab_7953	1.4063	6.94e-07	1.08295	UP	C04076;C01475	HMDB0001263	180.042	neg	M-H, M+Cl	C6H11NO3	2.4455	0.019468	-	73.3	-9.02391	1962-83-0	-	-	map01100;map00310;map01110;map00300;map00960;map01230	Metabolic pathways;Lysine degradation;Biosynthesis of secondary metabolites;Lysine biosynthesis;Tropane, piperidine and pyridine alkaloid biosynthesis;Biosynthesis of amino acids	Metabolism;Metabolism;Metabolism;Metabolism;Metabolism;Metabolism	Global and overview maps;Amino acid metabolism;Global and overview maps;Amino acid metabolism;Biosynthesis of other secondary metabolites;Global and overview maps	Organic acids and derivatives	Carboxylic acids and derivatives	Amino acids, peptides, and analogues	4.454	4.4545	4.6221	4.5002	4.4775	4.4425	4.1398	4.0983	4.1167	4.1571	4.203	4.1715	4.3974	4.3809	4.3863
neg_1221	5-O-a-L-Arabinofuranosyl-L-arabinose	metab_8367	1.3866	5.67e-05	0.947377	Down	-	HMDB0038880	845.277	neg	3M-H	C10H18O9	0.5912	0.0176426	-	80.4	-1.62714	-	-	-	-	-	-	-	Organic oxygen compounds	Organooxygen compounds	Carbohydrates and carbohydrate conjugates	6.5272	6.7105	6.7086	6.6483	6.5704	6.3805	6.9466	6.9684	7.015	6.9767	6.876	6.9594	6.8639	6.8567	6.8486
neg_1255	Mycophenolic acid O-acyl-glucuronide	metab_8400	1.8036	0.0007062	1.13976	UP	C20383	HMDB0060491	477.145	neg	M-H2O-H	C23H28O12	0.621	0.0505694	-	67.8	9.3781	-	-	-	-	-	-	-	Organic oxygen compounds	Organooxygen compounds	Carbohydrates and carbohydrate conjugates	5.2567	4.9547	5.1623	5.0331	5.0604	5.4983	4.6398	4.3297	4.7125	4.2093	4.8774	4.3997	4.8892	4.9163	4.8731
neg_1361	UDP-D-apiose	metab_8504	1.0619	1.05e-05	0.967761	Down	C01623	HMDB0012301	535.036	neg	M-H	C14H22N2O16P2	0.7034	0.0232621	-	78.2	-1.65918	20230-91-5	-	-	map00520	Amino sugar and nucleotide sugar metabolism	Metabolism	Carbohydrate metabolism	Nucleosides, nucleotides, and analogues	Pyrimidine nucleotides	Pyrimidine ribonucleotides	6.3892	6.3393	6.291	6.2753	6.2989	6.377	6.5335	6.4988	6.5963	6.5087	6.5878	6.5105	6.4821	6.4626	6.468
neg_1634	Inosine	metab_8777	1.8794	1.91e-06	0.878295	Down	C00294	HMDB0000195	267.073	neg	M-H	C10H12N4O5	1.0614	0.0221061	68.1	-	-1.26947	58-63-9	-	-	map01100;map00230	Metabolic pathways;Purine metabolism	Metabolism;Metabolism	Global and overview maps;Nucleotide metabolism	Nucleosides, nucleotides, and analogues	Purine nucleosides	Not Available	4.5565	4.5412	4.4189	4.3685	4.3535	4.6035	5.1126	5.044	5.0473	5.027	5.0177	5.313	4.934	4.9154	4.9208
neg_1642	Guanidylic acid (guanosine monophosphate)	metab_8785	1.3069	0.0001105	0.936938	Down	-	-	362.05	neg	M-H	C10H14N5O8P	1.069	0.0268017	81.9	-	-0.923065	-	-	-	-	-	-	-	-	-	-	4.7157	4.8935	4.73	4.7949	4.8191	4.6488	5.0415	5.136	5.1074	5.039	4.9656	5.2376	5.0137	4.9909	4.9984
neg_1676	2-Furoylglycine	metab_8819	1.4963	6.18e-05	1.10479	UP	-	HMDB0000439	168.029	neg	M-H	C7H7NO4	1.1074	0.0259367	-	62	-6.84153	5657-19-2	-	-	-	-	-	-	Organic acids and derivatives	Carboxylic acids and derivatives	Amino acids, peptides, and analogues	4.5885	4.3622	4.4493	4.2841	4.2928	4.5911	4.0251	4.0717	4.0607	3.8888	4.0477	3.9541	4.3127	4.2905	4.2985
neg_1770	3,3',4',5,6,7,8-Heptahydroxyflavone	metab_8913	2.2631	0.0002958	0.787143	Down	-	HMDB0030159	379.034	neg	M+FA-H	C15H10O9	1.4406	0.0063787	-	78.1	9.29076	87926-83-8	-	-	-	-	-	-	Phenylpropanoids and polyketides	Flavonoids	Flavones	3.2636	4.0003	4.1279	4.0904	4.1635	3.1816	4.8143	4.9947	4.91	4.7871	4.7533	4.7408	4.6353	4.6324	4.6379
neg_1789	(R)-2-Hydroxy-7,8-dimethoxy-2H-1,4-benzoxazin-3(4H)-one 2-glucoside	metab_8932	2.0278	2.5e-06	1.16804	UP	-	HMDB0037262	422.087	neg	M+Cl	C16H21NO10	1.4951	0.0251982	-	60.1	3.00866	40246-09-1	-	-	-	-	-	-	Organic oxygen compounds	Organooxygen compounds	Carbohydrates and carbohydrate conjugates	4.9959	4.8049	5.0394	5.0435	4.9693	4.7594	4.2248	4.2619	4.4313	4.0665	4.2821	4.0856	4.7941	4.7725	4.781
neg_1947	2'-Hydroxyenterolactone	metab_9090	2.0776	1.46e-05	1.15492	UP	-	HMDB0041645	335.088	neg	M+Na-2H	C18H18O5	1.9333	0.021113	-	57.9	-5.75957	-	-	-	-	-	-	-	Lignans, neolignans and related compounds	Furanoid lignans	Tetrahydrofuran lignans	5.939	5.565	5.7386	5.512	5.6068	5.5543	4.854	5.0071	5.006	4.6207	5.0954	4.783	5.4735	5.4556	5.4611
neg_2062	Caffeic Acid	metab_9205	1.4285	0.000532	1.10216	UP	C01481;C01197	HMDB0001964	179.034	neg	M-H	C9H8O4	2.1922	0.0315917	77.5	-	-6.19541	331-39-5	-	-	map01100;map00940;map01110	Metabolic pathways;Phenylpropanoid biosynthesis;Biosynthesis of secondary metabolites	Metabolism;Metabolism;Metabolism	Global and overview maps;Biosynthesis of other secondary metabolites;Global and overview maps	Phenylpropanoids and polyketides	Cinnamic acids and derivatives	Hydroxycinnamic acids and derivatives	4.1291	4.3819	4.5235	4.3635	4.4182	4.1383	3.784	3.8356	3.8722	3.9511	4.0193	4.0865	4.2302	4.2028	4.2149
neg_2148	Zymonic acid	metab_9291	1.4914	5.55e-07	0.917447	Down	-	HMDB0031210	139.002	neg	M-H2O-H	C6H6O5	2.3261	0.0268218	-	56.3	-8.29609	24891-71-2	-	-	-	-	-	-	Organoheterocyclic compounds	Dihydrofurans	Furanones	4.2645	4.3092	4.3186	4.1904	4.2614	4.3902	4.5984	4.6598	4.6811	4.7416	4.6512	4.7178	4.5625	4.5418	4.5433
neg_2150	Glycerol 1-propanoate	metab_9293	1.5607	2.34e-06	0.912253	Down	-	HMDB0031639	169.049	neg	M+Na-2H	C6H12O4	2.3261	0.0356028	-	65	8.56955	624-47-5	-	-	-	-	-	-	Lipids and lipid-like molecules	Glycerolipids	Monoradylglycerols	4.4404	4.4625	4.4501	4.3217	4.3783	4.5878	4.7706	4.8476	4.877	4.9488	4.8442	4.9151	4.7522	4.7234	4.7288
neg_2306	(E)-2-Methyl-2-buten-1-ol O-beta-D-Glucopyranoside	metab_9449	2.1934	4.56e-05	1.15155	UP	-	HMDB0033064	293.124	neg	M+FA-H	C11H20O6	2.783	0.0258875	-	60	-1.59013	-	-	-	-	-	-	-	Lipids and lipid-like molecules	Fatty Acyls	Fatty acyl glycosides	6.549	6.608	6.8421	6.7187	6.5992	6.2619	5.4855	5.5735	5.5324	5.7444	6.0734	5.961	6.4167	6.396	6.3991
neg_2416	6-(4-ethyl-3-hydroxyphenoxy)-3,4,5-trihydroxyoxane-2-carboxylic acid	metab_9559	1.8092	3.62e-06	0.878839	Down	-	HMDB0126441	295.082	neg	M-H2O-H	C14H18O8	3.0648	0.0275893	-	62.7	-2.59495	-	-	-	-	-	-	-	Organic oxygen compounds	Organooxygen compounds	Carbohydrates and carbohydrate conjugates	3.9852	4.3688	4.3539	4.2055	4.1943	4.2259	4.6974	4.8605	4.7383	4.8388	4.8125	4.8787	4.6589	4.6364	4.6409
neg_2551	(7'R)-(+)-Lyoniresinol 9'-glucoside	metab_9694	1.1393	0.004151	1.06567	UP	-	HMDB0038922	581.224	neg	M-H	C28H38O13	3.4755	0.0355419	-	90.8	-0.197887	87585-32-8	-	-	-	-	-	-	Lignans, neolignans and related compounds	Lignan glycosides	Not Available	4.6713	4.7318	5.0083	4.5566	4.5276	4.6006	4.4487	4.4959	4.4291	4.315	4.3187	4.3573	4.6205	4.5923	4.5961
neg_2553	Apigenin 7-[galactosyl-(1->4)-mannoside]	metab_9696	2.6707	1.26e-05	0.740564	Down	-	HMDB0037852	593.152	neg	M-H	C27H30O15	3.4835	0.0456418	-	92	0.968981	84638-36-8	-	-	-	-	-	-	Phenylpropanoids and polyketides	Flavonoids	Flavonoid glycosides	3.3796	4.0858	3.8902	3.9318	3.7391	3.3972	5.1283	5.4554	5.2614	4.8318	4.8364	4.7659	4.8739	4.8533	4.8343
neg_2555	6'-Sialyllactosamine	metab_9698	1.0695	0.01204	1.04615	UP	C04886	HMDB0041621	677.23	neg	M+FA-H	C23H40N2O18	3.4915	0.0307062	-	77.2	6.39927	191667-37-5	-	-	-	-	-	-	Organic oxygen compounds	Organooxygen compounds	Carbohydrates and carbohydrate conjugates	6.0836	6.2589	6.2821	6.2573	6.0647	5.753	5.7152	5.8772	5.8581	5.9052	5.8009	5.9239	6.0472	6.0266	6.0225
neg_2617	Maltulose	metab_9760	1.2396	0.000115	1.05639	UP	C19633	HMDB0029919	323.098	neg	M-H2O-H	C12H22O11	3.6653	0.0347619	-	50.6	-1.07572	17606-72-3	Carbohydrates	Oligosaccharides	-	-	-	-	Lipids and lipid-like molecules	Fatty Acyls	Fatty acyl glycosides	5.575	5.4177	5.5513	5.3796	5.3617	5.5211	5.0717	5.1202	5.2698	5.2173	5.1661	5.21	5.3678	5.3473	5.3386
neg_2624	3,4,5-trihydroxy-6-[1-(3-phenyloxiran-2-yl)ethoxy]oxane-2-carboxylic acid	metab_9767	1.032	0.005363	1.04116	UP	-	HMDB0133742	385.114	neg	M+FA-H	C16H20O8	3.689	0.033002	-	72.5	-1.03458	-	-	-	-	-	-	-	Organic oxygen compounds	Organooxygen compounds	Carbohydrates and carbohydrate conjugates	6.064	6.0025	6.0602	5.9252	5.7996	5.7423	5.5876	5.671	5.6194	5.7545	5.7292	5.8249	5.8643	5.8374	5.8428
neg_2634	8'-Episesaminone	metab_9777	1.2561	0.002771	1.07161	UP	-	HMDB0031941	739.209	neg	2M-H	C20H18O7	3.7209	0.0398039	-	58.8	7.8145	-	-	-	-	-	-	-	Lignans, neolignans and related compounds	Furanoid lignans	Tetrahydrofuran lignans	4.9565	5.3038	5.4355	5.1795	5.1965	5.2824	4.7817	4.6956	4.7751	5.0613	5.0055	4.9397	5.122	5.0901	5.0955
neg_2663	2''-Methoxy-(S)-oleuropein	metab_9806	2.0981	8.36e-06	0.840865	Down	-	HMDB0035445	551.177	neg	M-H2O-H	C26H34O14	3.8645	0.0358865	-	66.8	-0.49701	256498-10-9	-	-	-	-	-	-	Lipids and lipid-like molecules	Prenol lipids	Terpene glycosides	3.8146	4.3097	4.4115	4.3332	4.2236	4.2594	4.8394	4.9714	5.0455	5.1074	5.0823	5.1039	4.8367	4.8056	4.8197
neg_2669	7,8-Dihydrovomifoliol 9-[rhamnosyl-(1->6)-glucoside]	metab_9812	1.6267	3.55e-06	0.913025	Down	-	HMDB0029770	555.244	neg	M+Na-2H	C25H42O12	3.8964	0.0289951	-	61.9	3.78341	177261-69-7	-	-	-	-	-	-	Lipids and lipid-like molecules	Fatty Acyls	Fatty acyl glycosides	5.1769	5.1537	5.0424	4.9535	5.0044	4.8601	5.5682	5.5509	5.4779	5.4909	5.4534	5.5257	5.3982	5.3751	5.3783
neg_2690	Deuteroporphyrin IX	metab_9833	1.9604	0.003883	0.81593	Down	-	HMDB0000579	509.223	neg	M-H	C30H30N4O4	3.9596	0.0334502	-	81.6	7.65585	448-65-7	-	-	-	-	-	-	Organoheterocyclic compounds	Tetrapyrroles and derivatives	Porphyrins	3.2446	4.0793	4.4092	3.523	3.2085	3.7996	4.7209	4.8826	4.7647	4.375	4.2744	4.2693	4.4513	4.4222	4.4376
neg_2715	2',6'-Dihydroxy-4'-methoxyacetophenone	metab_9858	1.1547	0.002829	0.940534	Down	C10680	HMDB0029646	181.05	neg	M-H	C9H10O4	4.0465	0.0241758	-	60.5	-5.94684	7507-89-3	-	-	-	-	-	-	Organic oxygen compounds	Organooxygen compounds	Carbonyl compounds	4.8649	4.6495	4.5359	4.4443	4.4621	4.51	4.8292	4.7985	4.8104	5.0277	4.8327	4.9048	4.8015	4.7808	4.7884
neg_2716	Ferulic acid	metab_9859	1.3114	0.002288	0.93825	Down	C01494	-	193.05	neg	M-H	C10H10O4	4.0465	0.0300788	86.4	-	-5.1342	-	-	-	map01100;map00940;map01110	Metabolic pathways;Phenylpropanoid biosynthesis;Biosynthesis of secondary metabolites	Metabolism;Metabolism;Metabolism	Global and overview maps;Biosynthesis of other secondary metabolites;Global and overview maps	-	-	-	5.6138	5.5455	5.4007	5.8756	6.0065	5.6769	6.0157	6.1129	6.0931	5.9997	6.0646	6.0785	5.9633	5.9374	5.948
neg_2733	Decarbamoylsaxitoxin	metab_9876	1.2226	0.0008131	0.940625	Down	C20021	HMDB0038319	557.26	neg	2M+FA-H	C9H16N6O3	4.1096	0.0485778	-	65.1	9.49607	58911-04-9	-	-	-	-	-	-	Phenylpropanoids and polyketides	Saxitoxins, gonyautoxins, and derivatives	Not Available	4.9947	5.0571	4.9699	4.765	4.8461	4.6735	5.1611	5.2586	5.1353	5.1846	5.1407	5.2759	5.0917	5.0711	5.0495
neg_2735	(R)-Pelletierine	metab_9878	1.2925	0.0004699	1.08393	UP	-	HMDB0030324	186.113	neg	M+FA-H	C8H15NO	4.1412	0.0328208	-	63.5	-7.25933	2858-66-4	-	-	-	-	-	-	Organoheterocyclic compounds	Piperidines	Not Available	3.9791	4.0956	4.2659	4.2314	4.2692	4.2926	3.8244	3.859	3.9201	3.754	4.0201	3.81	4.0881	4.0597	4.0729
neg_2793	Gibberellin A86	metab_9936	1.2719	0.03458	0.922953	Down	-	HMDB0038450	401.124	neg	M+Na-2H	C19H24O8	4.5805	0.0243772	-	55.9	5.19799	138703-93-2	-	-	-	-	-	-	Organosulfur compounds	Thiocyanates	Not Available	5.0103	4.8701	4.4854	4.6977	4.9378	5.6878	5.4226	5.3264	5.428	5.2727	5.3077	5.4101	5.3318	5.3109	5.3187
neg_2797	Pulmatin	metab_9940	2.1893	5.05e-06	0.843799	Down	-	HMDB0030671	461.109	neg	M+FA-H	C21H20O9	4.6133	0.0350674	-	66.1	-0.438131	4839-60-5	-	-	-	-	-	-	Benzenoids	Anthracenes	Anthraquinones	4.4201	4.836	4.9817	4.7627	4.5611	4.624	5.5597	5.7755	5.6629	5.4796	5.5152	5.4103	5.3744	5.3536	5.345
neg_2802	Pelargonidin 3-O-glucoside	metab_9945	1.8355	5.78e-05	0.877494	Down	C12137	-	431.098	neg	M-H	C21H20O10	4.6699	0.0444941	67.4	-	-1.14605	-	-	-	map01100;map00942;map01110	Metabolic pathways;Anthocyanin biosynthesis;Biosynthesis of secondary metabolites	Metabolism;Metabolism;Metabolism	Global and overview maps;Biosynthesis of other secondary metabolites;Global and overview maps	-	-	-	4.2396	4.6841	4.9113	4.5687	4.457	4.4849	5.1232	5.2918	5.2239	5.1954	5.1813	5.1477	5.0414	5.0083	5.0083
neg_2805	Maysin	metab_9948	2.0236	2.16e-06	0.867731	Down	-	HMDB0037419;LMPK12110512	575.14	neg	M-H	C27H28O14	4.6947	0.0339537	-	69.6	-0.548596	70255-49-1	-	-	-	-	-	-	Phenylpropanoids and polyketides	Flavonoids	Flavonoid glycosides	4.4767	4.8108	4.8958	4.7338	4.7574	4.8636	5.4635	5.6276	5.5995	5.4046	5.3931	5.3999	5.3055	5.2779	5.2834
neg_2811	2-Feruloyl-1-sinapoylgentiobiose	metab_9954	1.0372	0.005902	0.960335	Down	-	HMDB0030334	723.214	neg	M-H	C33H40O18	4.734	0.041238	-	57.9	0.223981	-	-	-	-	-	-	-	Phenylpropanoids and polyketides	Cinnamic acids and derivatives	Hydroxycinnamic acids and derivatives	5.3817	5.4778	5.5066	5.6887	5.6683	5.7849	5.893	5.8203	5.8231	5.8311	5.7234	5.8011	5.7516	5.7307	5.7161
neg_2829	Erbstatin Analog	metab_9972	1.5212	4.76e-05	1.10132	UP	-	-	193.05	neg	M-H	C10H10O4	4.9453	0.015727	64.3	-	-4.64932	-	-	-	-	-	-	-	-	-	-	4.4661	4.6203	4.7422	4.6898	4.6992	4.3667	4.1208	4.2053	4.1753	4.1727	4.2111	4.1613	4.4757	4.4621	4.4675
neg_2917	Diosmetin	metab_10060	2.0496	6.16e-05	0.86552	Down	C10038	HMDB0029676;LMPK12110824	299.056	neg	M-H	C16H12O6	5.9339	0.0239829	87	-	-1.19138	520-34-3	-	-	-	-	-	-	Phenylpropanoids and polyketides	Flavonoids	O-methylated flavonoids	4.5543	5.1047	4.8932	5.0236	4.9646	5.0796	5.7093	5.9768	5.8875	5.5548	5.4427	5.6511	5.5369	5.5161	5.5253
neg_2920	D-Tartaric acid	metab_10063	2.077	0.001135	1.25087	UP	C02107;C00898	HMDB0029878	299.026	neg	2M-H	C4H6O6	5.942	0.254628	-	53.6	2.73287	147-71-7	-	-	map00630	Glyoxylate and dicarboxylate metabolism	Metabolism	Carbohydrate metabolism	Organic oxygen compounds	Organooxygen compounds	Carbohydrates and carbohydrate conjugates	4.4034	4.1926	4.3431	4.2761	4.16	4.1584	3.3195	2.9743	3.2957	3.8621	4.0279	2.9331	4.6242	4.7969	4.852
neg_2970	FA(18:1(OH3))	metab_10113	1.8046	0.0001647	0.905034	Down	-	-	329.233	neg	M-H	C18H34O5	6.0544	0.0225255	63.9	-	-1.50572	-	-	-	-	-	-	-	-	-	-	5.8948	6.3057	5.8	5.7147	5.91	5.7419	6.3819	6.6737	6.5092	6.4096	6.3997	6.7041	6.3657	6.3467	6.3522
neg_3023	MG(0:0/18:4(6Z,9Z,12Z,15Z)/0:0)	metab_10166	1.52	0.02755	1.20705	UP	-	HMDB0011541	395.243	neg	M+FA-H	C21H34O4	6.1544	0.0532608	-	69.9	-2.55499	-	-	-	-	-	-	-	Lipids and lipid-like molecules	Fatty Acyls	Lineolic acids and derivatives	3.9103	3.1642	3.7973	3.5214	3.7572	5.0186	3.2312	3.3212	3.1955	3.1542	3.1473	3.1454	4.0267	3.9865	3.9879
neg_3096	(±)9-HODE	metab_10237	1.9029	0.0001422	0.872213	Down	-	-	295.227	neg	M-H	C18H32O3	6.307	0.0498201	68.7	-	-2.16408	-	-	-	-	-	-	-	-	-	-	4.8099	4.9987	4.6602	4.4443	4.7191	4.4405	5.1746	5.5871	5.4142	5.3846	5.1232	5.5019	5.2056	5.1661	5.1716
neg_3156	LPC(16:0)	metab_10296	1.1896	0.001177	0.956459	Down	C04230	LMGP01050018	540.33	neg	M+FA-H	C24H50NO7P	6.4425	0.0482188	83.1	-	-1.33169	-	Lipids	Phospholipids	map00564	Glycerophospholipid metabolism	Metabolism	Lipid metabolism	-	-	-	6.4609	6.6191	6.5259	6.4158	6.424	6.4136	6.5049	6.8397	6.863	6.8083	6.7406	6.8718	6.7057	6.6673	6.6732
neg_3219	3-Dehydrosphinganine	metab_10357	1.2468	0.002462	1.07835	UP	C02934	HMDB0001480;LMSP01020002	280.264	neg	M-H2O-H	C18H37NO2	6.6004	0.106577	-	96.5	-2.14983	16105-69-4	-	-	map00600;map01100	Sphingolipid metabolism;Metabolic pathways	Metabolism;Metabolism	Lipid metabolism;Global and overview maps	Organic oxygen compounds	Organooxygen compounds	Carbonyl compounds	4.4581	4.3111	4.433	4.5588	4.6034	4.107	4.1285	3.98	4.1525	4.0716	4.0408	4.1746	4.2272	4.3004	4.2183
neg_3338	Camelliagenin B	metab_10468	1.0662	0.005622	0.948901	Down	-	HMDB0034531	509.324	neg	M+Na-2H	C30H48O5	6.9568	0.0500966	-	78.3	-2.09	14511-74-1	-	-	-	-	-	-	Lipids and lipid-like molecules	Prenol lipids	Triterpenoids	5.2834	5.171	5.3121	5.1511	5.1102	5.103	5.2887	5.2179	5.5822	5.6291	5.5951	5.4942	5.4518	5.4086	5.4368
neg_4267	LysoPA(0:0/18:2(9Z,12Z))	metab_11388	1.1134	3.41e-05	0.971155	Down	-	HMDB0007852	433.235	neg	M-H	C21H39O7P	7.0328	0.027077	-	84.1	-2.53012	-	-	-	-	-	-	-	Lipids and lipid-like molecules	Glycerophospholipids	Glycerophosphates	7.9458	7.995	7.9791	8.0455	8.0526	7.922	8.1942	8.2129	8.3226	8.1477	8.2055	8.281	8.1496	8.1266	8.1344
neg_4506	LysoPC(15:0)	metab_11616	1.2215	0.001226	0.950229	Down	C04230	HMDB0010381	480.309	neg	M-H	C23H48NO7P	6.4425	0.0430279	-	59.3	-1.42312	-	Lipids	Phospholipids	map00564	Glycerophospholipid metabolism	Metabolism	Lipid metabolism	Lipids and lipid-like molecules	Glycerophospholipids	Glycerophosphocholines	5.9092	6.0898	5.9837	5.8576	5.8887	5.8605	5.9626	6.3221	6.3254	6.2874	6.2102	6.3459	6.1689	6.1342	6.1404
neg_4753	2,3-dinor Prostaglandin E1	metab_11856	1.0127	0.008455	0.951	Down	-	-	325.201	neg	M-H	C18H30O5	6.0466	0.0215316	59.9	-	-1.94025	-	-	-	-	-	-	-	-	-	-	5.0051	4.7401	4.7622	4.494	4.6637	4.8456	4.9586	4.9035	4.981	5.0835	5.0509	5.0022	4.9265	4.9084	4.9138
neg_4807	2-{[hydroxy(4-methoxy-1-benzofuran-5-yl)methylidene]amino}acetic acid	metab_11910	2.2413	0.0002379	0.765156	Down	-	HMDB0129408	284.032	neg	M+Cl	C12H11NO5	5.9258	0.03386	-	79.2	-3.41987	-	-	-	-	-	-	-	Organic acids and derivatives	Carboxylic acids and derivatives	Amino acids, peptides, and analogues	2.3998	3.3837	3.0585	3.224	3.0915	3.2999	4.0445	4.3042	4.2207	3.8569	3.7243	3.9718	3.8145	3.787	3.7924
neg_4835	Maltol propionate	metab_11938	1.1307	0.02616	0.940475	Down	-	HMDB0037274	181.05	neg	M-H	C9H10O4	5.7487	0.0225003	-	78.2	-5.99414	68555-63-5	-	-	-	-	-	-	Organoheterocyclic compounds	Pyrans	Pyranones and derivatives	5.8773	5.7023	5.5761	5.2505	5.2427	5.1921	5.7283	5.6512	5.7648	6.0816	5.7702	5.9235	5.7654	5.746	5.7576
neg_4985	Isopentyl beta-D-glucoside	metab_12086	2.0184	1.75e-05	1.2081	UP	-	HMDB0034750	249.134	neg	M-H	C11H22O6	4.3496	0.0399494	-	92.5	-1.84058	-	-	-	-	-	-	-	Lipids and lipid-like molecules	Fatty Acyls	Fatty acyl glycosides	4.3786	4.2053	4.3141	4.2262	4.3161	4.5579	3.5837	3.8821	3.5932	3.4271	3.7197	3.3141	4.186	4.1656	4.1516
neg_5038	Propylene glycol alginate	metab_12139	2.233	0.0001642	0.818284	Down	-	HMDB0039860	475.124	neg	M+Cl	C17H28O13	4.086	0.0585678	-	64	3.65486	-	-	-	-	-	-	-	Organic oxygen compounds	Organooxygen compounds	Carbohydrates and carbohydrate conjugates	4.0747	4.4222	4.5028	4.1237	4.0231	4.4837	5.1442	5.7078	5.5599	5.0033	4.9442	4.9625	5.0612	5.0403	5.0103
neg_5054	4-Ipomeanol	metab_12155	1.28	0.002107	0.924549	Down	-	HMDB0030472	149.059	neg	M-H2O-H	C9H12O3	4.0465	0.0328002	-	52.1	-7.90094	32954-58-8	-	-	-	-	-	-	Organic oxygen compounds	Organooxygen compounds	Carbonyl compounds	4.278	4.2336	4.0987	4.5314	4.6628	4.335	4.6677	4.7585	4.7556	4.641	4.7113	4.7386	4.6174	4.5889	4.602
neg_5058	Vitexin	metab_12159	1.594	0.004947	0.895125	Down	C01460	LMPK12110194	431.098	neg	M-H	C21H20O10	4.0386	0.0312983	70.4	-	-1.39854	-	-	-	map00941;map00944	Flavonoid biosynthesis;Flavone and flavonol biosynthesis	Metabolism;Metabolism	Biosynthesis of other secondary metabolites;Biosynthesis of other secondary metabolites	-	-	-	4.6649	5.01	5.087	4.5056	4.2669	4.9911	5.2872	5.6509	5.4095	5.1646	5.1576	5.1978	5.192	5.1649	5.1767
neg_5062	Swertiajaponin	metab_12163	2.0937	0.007777	0.794158	Down	C10187	HMDB0030569;LMPK12111030	461.109	neg	M-H	C22H22O11	4.0308	0.0290197	-	87.8	-0.760688	6980-25-2	-	-	-	-	-	-	Phenylpropanoids and polyketides	Flavonoids	Flavonoid glycosides	3.5742	4.0762	4.2039	3.2286	3.2218	4.4589	4.8454	5.5298	5.1846	4.3264	4.3242	4.4534	4.7709	4.7459	4.7556
neg_5140	Deoxypyridinoline	metab_12241	1.3595	0.0001148	0.92262	Down	-	HMDB0000569	433.169	neg	M+Na-2H	C18H28N4O7	3.7209	0.0335693	-	70.6	-4.269	83462-55-9	-	-	-	-	-	-	Organic acids and derivatives	Carboxylic acids and derivatives	Amino acids, peptides, and analogues	4.258	4.4198	4.5223	4.4387	4.4488	4.134	4.7263	4.7049	4.7546	4.766	4.7568	4.7122	4.6272	4.5998	4.6055
neg_5143	(1S,2S,4R,8S)-p-Menthane-1,2,8,9-tetrol 2-glucoside	metab_12244	1.3122	7.43e-05	0.947274	Down	-	HMDB0039975	365.181	neg	M-H	C16H30O9	3.7209	0.040209	-	76	-1.55907	402593-52-6	-	-	-	-	-	-	Lipids and lipid-like molecules	Prenol lipids	Terpene glycosides	5.9089	6.0596	6.1542	6.0905	6.0923	5.828	6.3377	6.3316	6.3616	6.3917	6.3632	6.3589	6.2596	6.2273	6.2327
neg_5224	Eremopetasitenin B2	metab_12325	3.1244	1.21e-08	1.47697	UP	-	HMDB0030901	509.187	neg	M+FA-H	C24H32O7S	3.5152	0.0374537	-	54.1	4.17663	189100-15-0	-	-	-	-	-	-	Phenylpropanoids and polyketides	2-arylbenzofuran flavonoids	Not Available	5.3139	5.3265	5.3727	5.0733	4.9734	5.2569	3.2921	3.6992	3.4549	3.6329	3.7536	3.3707	4.9477	4.9174	4.9229
neg_5252	6''-Malonylapiin	metab_12353	1.9761	1.16e-05	0.858352	Down	-	HMDB0037601	631.128	neg	M-H2O-H	C29H30O17	3.4117	0.041484	-	90.7	-3.80707	60478-75-3	-	-	-	-	-	-	Phenylpropanoids and polyketides	Flavonoids	Flavonoid glycosides	3.9204	4.4489	4.466	4.3332	4.2699	4.2962	4.9755	5.1283	5.0837	4.9489	4.9371	4.9079	4.8034	4.7674	4.7883
neg_5263	Acetyl-DL-Leucine	metab_12364	1.1205	0.04034	1.0607	UP	C02710	-	172.097	neg	M-H	C8H15NO3	3.3717	0.0200812	81.8	-	-6.43031	-	-	-	-	-	-	-	-	-	-	5.6292	5.5234	5.6233	5.812	5.745	5.0938	5.0169	5.0907	5.098	5.3317	5.5243	5.4522	5.5233	5.5062	5.5118
neg_5271	Chlorogenic acid	metab_12372	1.0083	0.008631	1.04819	UP	C00852	HMDB0003164	335.077	neg	M-H2O-H	C16H18O9	3.3399	0.0340725	-	52	-1.0103	327-97-9	-	-	map00940;map00941;map01110;map00945	Phenylpropanoid biosynthesis;Flavonoid biosynthesis;Biosynthesis of secondary metabolites;Stilbenoid, diarylheptanoid and gingerol biosynthesis	Metabolism;Metabolism;Metabolism;Metabolism	Biosynthesis of other secondary metabolites;Biosynthesis of other secondary metabolites;Global and overview maps;Biosynthesis of other secondary metabolites	Organic oxygen compounds	Organooxygen compounds	Alcohols and polyols	5.0385	5.2026	5.4068	5.1795	5.0969	5.029	4.8245	4.8521	4.802	5.0009	4.9814	5.0692	5.1054	5.0758	5.0901
neg_5379	Isosyringinoside	metab_12480	1.9982	1.06e-06	0.864418	Down	-	HMDB0040814	555.171	neg	M+Na-2H	C23H34O14	3.1272	0.0297236	-	55.6	3.20811	152686-85-6	-	-	-	-	-	-	Organic oxygen compounds	Organooxygen compounds	Carbohydrates and carbohydrate conjugates	4.4439	4.4883	4.4383	4.2124	4.3531	4.6421	5.0659	5.1658	5.2292	5.1321	5.0067	5.1471	4.9375	4.9133	4.918
neg_5394	Kaempferol 3-xylosylglucoside	metab_12495	2.1095	4.16e-05	0.840885	Down	-	HMDB0039507	579.135	neg	M-H	C26H28O15	3.0958	0.00904809	-	80.4	-0.942489	29322-07-4	-	-	-	-	-	-	Phenylpropanoids and polyketides	Flavonoids	Flavonoid glycosides	4.1864	4.6216	4.5766	4.3935	4.3257	4.2831	5.2689	5.5571	5.4701	5.0379	5.0518	4.9941	5.0915	5.0838	5.0893
neg_5407	Poncirin	metab_12508	1.3206	0.0002039	0.937284	Down	C09830	LMPK12140333;HMDB0037487	631.149	neg	M+K-2H	C28H34O14	3.0648	0.0116531	-	59.1	8.83098	14941-08-3	-	-	-	-	-	-	Phenylpropanoids and polyketides	Flavonoids	Flavonoid glycosides	4.9917	5.2725	5.3486	5.2097	5.1735	4.9983	5.4879	5.5112	5.5219	5.4715	5.5043	5.5714	5.4752	5.4793	5.4852
neg_5413	(S)-2,3-Dihydro-5-hydroxy-2-methyl-1,4-naphthoquinone	metab_12514	1.8171	4.72e-06	0.864255	Down	-	HMDB0041122	235.06	neg	M+FA-H	C11H10O3	3.0648	0.0117279	-	85.6	-4.93986	76372-21-9	-	-	-	-	-	-	Benzenoids	Naphthalenes	Naphthoquinones	3.628	3.9392	3.9814	3.8626	3.8072	3.6669	4.3023	4.4607	4.3342	4.4219	4.4323	4.5284	4.269	4.2739	4.2792
neg_5435	Stachyoside A	metab_12536	1.131	0.002222	0.96386	Down	-	HMDB0039092	547.166	neg	M+Na-2H	C21H34O15	3.0342	0.0286909	-	85.9	2.44179	131862-10-7	-	-	-	-	-	-	Lipids and lipid-like molecules	Prenol lipids	Terpene glycosides	7.1009	7.4042	7.5183	7.4975	7.4799	7.2847	7.629	7.7005	7.6911	7.6164	7.6215	7.6875	7.5964	7.5728	7.5782
neg_5591	(S)-Isowillardiine	metab_12692	1.3364	0.01106	1.10753	UP	C08289	HMDB0030376	180.042	neg	M-H2O-H	C7H9N3O4	2.7752	0.0161589	-	75.9	1.06567	21381-33-9	-	-	-	-	-	-	Organic acids and derivatives	Carboxylic acids and derivatives	Amino acids, peptides, and analogues	4.274	4.5002	4.7796	4.6749	4.6209	4.0663	4.2672	3.8375	4.1546	4.2636	3.774	4.0057	4.3978	4.3839	4.3893
neg_5629	Ethyl phenylglycidate	metab_12730	1.3061	7.68e-05	1.07946	UP	-	HMDB0031623	237.076	neg	M+FA-H	C11H12O3	2.6809	0.0260251	-	64.9	-3.11804	54276-44-7	-	-	-	-	-	-	Organoheterocyclic compounds	Epoxides	Oxirane carboxylic acids and derivatives	4.5158	4.2647	4.311	4.2427	4.2451	4.3666	3.9322	3.9734	3.9583	4.0513	4.0915	4.0294	4.2633	4.2425	4.2454
neg_5651	Cascaroside A	metab_12752	1.7375	0.001267	0.883572	Down	C10307	LMPK13040003;HMDB0035756	615.154	neg	M+Cl	C27H32O14	2.6415	0.0312768	-	69.2	8.50279	53823-08-8	-	-	-	-	-	-	Organic oxygen compounds	Organooxygen compounds	Carbohydrates and carbohydrate conjugates	4.0508	4.5333	4.4762	4.829	4.9602	4.7503	5.1975	5.2688	5.2403	5.2208	5.0456	5.2636	5.0676	5.0406	5.0524
neg_5815	Pseudooxynicotine	metab_12916	1.7075	0.00123	1.15024	UP	C20361	HMDB0001240	223.108	neg	M+FA-H	C10H14N2O	2.3182	0.0144901	-	52.5	-3.7854	2055-23-4	-	-	map00760	Nicotinate and nicotinamide metabolism	Metabolism	Metabolism of cofactors and vitamins	Organic oxygen compounds	Organooxygen compounds	Carbonyl compounds	4.4399	4.1577	4.3178	4.6214	4.5829	4.1244	3.5111	3.6449	3.7035	3.8053	4.118	4.0334	4.2662	4.2536	4.2591
neg_5877	N-Benzoylaspartic acid	metab_12978	1.1537	0.03612	1.05913	UP	-	HMDB0034251	282.062	neg	M+FA-H	C11H11NO5	2.2546	0.0223247	-	53.7	-1.60768	4631-12-3	-	-	-	-	-	-	Organic acids and derivatives	Carboxylic acids and derivatives	Amino acids, peptides, and analogues	6.0839	6.0768	6.1497	6.062	5.8968	5.3416	5.5472	5.7294	5.7991	5.4018	5.6216	5.5235	5.8723	5.8544	5.857
neg_5885	2-METHOXYRESORCINOL	metab_12986	1.3361	0.0002363	0.930854	Down	-	-	139.039	neg	M-H	C7H8O3	2.2467	0.0204104	83.6	-	-9.93519	-	-	-	-	-	-	-	-	-	-	4.4523	4.5876	4.6823	4.79	4.827	4.7629	4.9692	4.95	5.0654	5.0791	5.0554	5.0705	4.9555	4.9383	4.9437
neg_5910	L-Tryptophan	metab_13011	1.5421	0.0004531	1.0767	UP	C00078	HMDB0000929	203.082	neg	M-H	C11H12N2O2	2.2233	0.0242106	90.8	-	-4.98329	73-22-3	Peptides	Amino acids	map01100;map01110;map00260;map01210;map01230;map00966;map00901;map00970;map00400;map00380	Metabolic pathways;Biosynthesis of secondary metabolites;Glycine, serine and threonine metabolism;2-Oxocarboxylic acid metabolism;Biosynthesis of amino acids;Glucosinolate biosynthesis;Indole alkaloid biosynthesis;Aminoacyl-tRNA biosynthesis;Phenylalanine, tyrosine and tryptophan biosynthesis;Tryptophan metabolism	Metabolism;Metabolism;Metabolism;Metabolism;Metabolism;Metabolism;Metabolism;Genetic Information Processing;Metabolism;Metabolism	Global and overview maps;Global and overview maps;Amino acid metabolism;Global and overview maps;Global and overview maps;Biosynthesis of other secondary metabolites;Biosynthesis of other secondary metabolites;Translation;Amino acid metabolism;Amino acid metabolism	Organoheterocyclic compounds	Indoles and derivatives	Indolyl carboxylic acids and derivatives	6.6421	6.7912	6.5925	6.3894	6.535	6.2985	5.9238	5.8835	6.1337	6.19	6.1444	6.1775	6.4214	6.4007	6.4083
neg_5911	3-amino-2-naphthoic acid	metab_13012	1.3696	0.0004731	1.09493	UP	-	-	186.055	neg	M-H	C11H9NO2	2.2233	0.035226	91.5	-	-5.75421	-	-	-	-	-	-	-	-	-	-	4.3924	4.5156	4.3054	4.1439	4.2661	4.1067	3.7848	3.823	3.9453	3.9785	3.9435	4.0243	4.196	4.1674	4.1729
neg_5941	Coumestrin	metab_13042	1.944	9.64e-05	1.15532	UP	-	HMDB0033587	467.036	neg	M+K-2H	C21H18O10	2.1845	0.0258029	-	65.1	-6.26214	92631-72-6	-	-	-	-	-	-	Phenylpropanoids and polyketides	Isoflavonoids	Coumestans	5.4508	5.2866	5.3178	5.1847	5.1923	5.4404	4.5243	5.0206	4.6851	4.3706	4.6682	4.319	5.3138	5.2931	5.2964
neg_5950	Ethyl beta-D-glucopyranoside	metab_13051	2.252	0.000158	1.22462	UP	-	HMDB0029968	207.086	neg	M-H	C8H16O6	2.1845	0.0193525	-	60.8	-4.63364	3198-49-0	-	-	-	-	-	-	Organic oxygen compounds	Organooxygen compounds	Carbohydrates and carbohydrate conjugates	5.7707	5.3601	5.2166	5.0136	5.0052	5.4834	4.2374	4.7974	4.4439	4.0864	4.4073	4.0353	5.1648	5.1484	5.1538
neg_5973	(R)-2-Hydroxy-2H-1,4-benzoxazin-3(4H)-one	metab_13074	1.3227	0.004615	1.07032	UP	C15769	HMDB0038318	146.023	neg	M-H2O-H	C8H7NO3	2.1454	0.0197466	-	51.6	-8.40426	-	-	-	map01110	Biosynthesis of secondary metabolites	Metabolism	Global and overview maps	Organoheterocyclic compounds	Benzoxazines	Benzoxazinones	6.0925	5.8395	5.7785	5.5869	5.5442	5.6508	5.4525	5.4814	5.5485	5.1695	5.3736	5.2006	5.666	5.6493	5.6547
neg_6019	2-HYDROXY-3,4-DIMETHOXYBENZOIC ACID	metab_13120	1.7631	2e-06	0.885755	Down	-	HMDB0142084	197.045	neg	M-H	C9H10O5	2.0669	0.0223889	86.3	-	-4.41373	-	-	-	-	-	-	-	Benzenoids	Benzene and substituted derivatives	Benzoic acids and derivatives	4.2903	4.3872	4.4681	4.1685	4.1862	4.2733	4.8428	4.8996	4.9653	4.8261	4.7351	4.829	4.6924	4.6745	4.6771
neg_6146	Gallic acid	metab_13247	1.0471	0.001429	0.950427	Down	C01424	HMDB0005807	169.013	neg	M-H	C7H6O5	1.7767	0.0259165	61.7	-	-6.59686	149-91-7	-	-	-	-	-	-	Benzenoids	Benzene and substituted derivatives	Benzoic acids and derivatives	4.321	4.5051	4.6454	4.5463	4.6015	4.4996	4.685	4.6684	4.7806	4.833	4.827	4.7394	4.7054	4.6836	4.6901
neg_6271	Epinephrine glucuronide	metab_13372	1.6309	0.001774	1.12498	UP	-	HMDB0010336	396.073	neg	M+K-2H	C15H21NO9	1.5029	0.0229465	-	56.2	7.23401	54964-61-3	-	-	-	-	-	-	Organic oxygen compounds	Organooxygen compounds	Carbohydrates and carbohydrate conjugates	4.9407	4.8879	4.991	4.7891	4.7623	4.6668	4.4711	4.4744	4.6246	3.8342	4.2839	4.1237	4.7294	4.7095	4.72
neg_6272	2-Hepteneoylglycine	metab_13373	1.6938	0.001266	1.15794	UP	-	HMDB0094728	206.081	neg	M+Na-2H	C9H15NO3	1.5029	0.0334093	-	76.7	8.32342	-	-	-	-	-	-	-	Organic acids and derivatives	Carboxylic acids and derivatives	Amino acids, peptides, and analogues	4.2826	4.2365	4.3235	4.1048	4.072	3.9666	3.7447	3.7643	3.9162	3.1567	3.6235	3.3725	4.029	4	4.0138
neg_6278	Saxitoxin	metab_13379	2.155	2.25e-06	1.2094	UP	C13757	HMDB0029368	334.104	neg	M+Cl	C10H17N7O4	1.4951	0.0246658	-	62.6	2.08537	35523-89-8	-	-	-	-	-	-	Phenylpropanoids and polyketides	Saxitoxins, gonyautoxins, and derivatives	Not Available	4.7503	4.6289	4.8356	4.6794	4.6127	4.2976	3.7129	3.8401	3.8254	3.776	3.9741	3.8618	4.4712	4.4498	4.4599
neg_6350	Benzoic acid	metab_13451	2.5375	0.0003496	1.29357	UP	C00539;C09815;C00261;C00180	HMDB0001870	341.088	neg	M-H2O-H	C15H20O10	1.2934	0.0203919	53.4	-	0.560888	65-85-0	-	-	map01100;map01110;map00360	Metabolic pathways;Biosynthesis of secondary metabolites;Phenylalanine metabolism	Metabolism;Metabolism;Metabolism	Global and overview maps;Global and overview maps;Amino acid metabolism	Benzenoids	Benzene and substituted derivatives	Benzoic acids and derivatives	5.4433	5.3726	5.4031	5.2207	5.3104	5.5225	4.038	4.6337	4.6076	3.2505	4.5748	3.8439	5.2258	5.2086	5.214
neg_6415	L-trans-alpha-Amino-2-carboxycyclopropaneacetic acid	metab_13516	1.5245	5.86e-05	1.10321	UP	-	HMDB0034442	204.05	neg	M+FA-H	C6H9NO4	1.1074	0.0244271	-	69.6	-5.4871	117857-93-9	-	-	-	-	-	-	Organic acids and derivatives	Carboxylic acids and derivatives	Amino acids, peptides, and analogues	4.7771	4.597	4.68	4.449	4.4679	4.7618	4.1844	4.2161	4.2419	4.0596	4.265	4.1712	4.4906	4.4699	4.4845
neg_6487	Guanosine	metab_13588	1.0442	0.008912	0.960657	Down	C00387	HMDB0000133	282.084	neg	M-H	C10H13N5O5	1.046	0.0177032	80.7	-	-1.21039	118-00-3	Nucleic acids	Nucleosides	map01100;map00230	Metabolic pathways;Purine metabolism	Metabolism;Metabolism	Global and overview maps;Nucleotide metabolism	Nucleosides, nucleotides, and analogues	Purine nucleosides	Not Available	6.2568	6.179	6.008	5.9062	5.8268	6.2367	6.307	6.2686	6.284	6.3367	6.3006	6.4079	6.2731	6.258	6.2634
neg_6546	D-glycero-L-galacto-Octulose	metab_13647	1.056	0.0002778	1.05348	UP	-	HMDB0029954	221.066	neg	M-H2O-H	C8H16O8	0.9768	0.0322611	-	90.7	-3.09516	-	-	-	-	-	-	-	Organic oxygen compounds	Organooxygen compounds	Carbohydrates and carbohydrate conjugates	4.4932	4.4674	4.4478	4.3652	4.3811	4.6449	4.2112	4.236	4.241	4.2429	4.2603	4.2477	4.4352	4.4072	4.4198
neg_6598	Kanzonol M	metab_13699	1.6295	0.0003812	1.09048	UP	-	HMDB0041101	435.119	neg	M+K-2H	C23H26O6	0.9308	0.0249916	-	53.8	-7.48858	156250-70-3	-	-	-	-	-	-	Phenylpropanoids and polyketides	Isoflavonoids	O-methylated isoflavonoids	5.9902	5.7975	6.1367	6.0762	5.98	5.736	5.454	5.4598	5.7518	5.305	5.5053	5.2771	5.8766	5.8559	5.861
neg_6615	Para-hydroxyrosiglitazone	metab_13716	1.7287	0.00207	0.865365	Down	-	HMDB0060981	372.104	neg	M-H	C18H19N3O4S	0.9232	0.0163048	-	52.4	5.34596	-	-	-	-	-	-	-	Benzenoids	Phenol ethers	Not Available	4.7164	4.5545	4.2345	4.1836	4.2774	3.6465	4.8067	4.8243	4.8406	5.0304	4.9277	5.1681	4.8049	4.7908	4.7965
neg_6619	Uridine	metab_13719	1.4681	0.002195	0.923719	Down	C00299	HMDB0000296	243.062	neg	M-H	C9H12N2O6	0.9232	0.0223226	79.9	-	-2.41102	58-96-8	Nucleic acids	Nucleosides	map00240;map01100	Pyrimidine metabolism;Metabolic pathways	Metabolism;Metabolism	Nucleotide metabolism;Global and overview maps	Nucleosides, nucleotides, and analogues	Pyrimidine nucleosides	Not Available	5.8577	5.8296	5.599	5.5634	5.615	5.398	5.9209	5.9435	5.9309	6.2781	6.1351	6.4506	6.0086	5.9906	5.9936
neg_6644	NADH	metab_13744	1.56	0.000507	1.087	UP	C00004;C00003	HMDB0001487	664.117	neg	M-H	C21H29N7O14P2	0.908	0.0189758	58.6	-	-0.963034	58-68-4	-;Vitamins and Cofactors	-;Cofactors	map01100;map00730;map00190;map00760	Metabolic pathways;Thiamine metabolism;Oxidative phosphorylation;Nicotinate and nicotinamide metabolism	Metabolism;Metabolism;Metabolism;Metabolism	Global and overview maps;Metabolism of cofactors and vitamins;Energy metabolism;Metabolism of cofactors and vitamins	Nucleosides, nucleotides, and analogues	(5'->5')-dinucleotides	Not Available	6.0248	5.6092	5.8578	5.7328	5.7572	5.6845	5.1606	5.2243	5.1687	5.4262	5.5974	5.3146	5.652	5.6393	5.6367
neg_6768	23-Hydroxyphysalolactone	metab_13868	2.1342	6.75e-07	0.871775	Down	-	HMDB0031388	591.177	neg	M+K-2H	C28H39ClO9	0.7631	0.017465	-	67.6	0.469691	118194-16-4	-	-	-	-	-	-	Lipids and lipid-like molecules	Steroids and steroid derivatives	Steroid lactones	5.6188	5.6436	5.5471	5.4631	5.4414	5.2643	6.2268	6.332	6.1736	6.3484	6.2514	6.4967	6.0445	6.0302	6.0332
neg_6780	N-Acetylglutamic acid	metab_13880	1.1935	0.002545	1.0681	UP	C00624	HMDB0001138	170.045	neg	M-H2O-H	C7H11NO5	0.7556	0.0222212	-	52.6	-6.19924	1188-37-0	-	-	map01100;map01210;map00220;map01110;map01230	Metabolic pathways;2-Oxocarboxylic acid metabolism;Arginine biosynthesis;Biosynthesis of secondary metabolites;Biosynthesis of amino acids	Metabolism;Metabolism;Metabolism;Metabolism;Metabolism	Global and overview maps;Global and overview maps;Amino acid metabolism;Global and overview maps;Global and overview maps	Organic acids and derivatives	Carboxylic acids and derivatives	Amino acids, peptides, and analogues	4.9721	4.5764	4.6455	4.6454	4.5977	4.5006	4.3834	4.4055	4.4031	4.4206	4.3358	4.2081	4.5909	4.5732	4.5756
neg_6938	1-(gamma-Glutamylamino)cyclopropanecarboxylic acid	metab_14033	1.3287	0.001218	1.06235	UP	-	HMDB0031701	275.088	neg	M+FA-H	C9H14N2O5	0.6435	0.0256642	-	67.8	-1.85344	171437-78-8	-	-	-	-	-	-	Organic acids and derivatives	Carboxylic acids and derivatives	Amino acids, peptides, and analogues	6.4434	6.0444	6.0567	6.0224	6.0064	6.0208	5.7951	5.7591	5.8634	5.757	5.7021	5.5696	5.9772	5.9567	5.9596
neg_6982	8-Acetoxypinoresinol 4-glucoside	metab_14075	1.9811	5.93e-07	0.882991	Down	-	HMDB0033283	615.153	neg	M+K-2H	C28H34O13	0.621	0.043814	-	59.3	7.31736	-	-	-	-	-	-	-	Lignans, neolignans and related compounds	Lignan glycosides	Not Available	5.3574	5.3349	5.3396	5.3867	5.2317	5.0451	5.9856	5.985	5.8831	6.1413	5.9592	5.9413	5.7048	5.6698	5.6754
neg_6989	Panose	metab_14082	1.5293	1.65e-06	0.944374	Down	C00713;C03661	HMDB0029937	539.138	neg	M+Cl	C18H32O16	0.6136	0.0230525	-	95.1	-1.79912	33401-87-5	-	-	-	-	-	-	Organic oxygen compounds	Organooxygen compounds	Carbohydrates and carbohydrate conjugates	7.0035	7.0133	6.9082	6.8686	6.8685	6.9425	7.3828	7.3278	7.2412	7.3571	7.2843	7.462	7.2284	7.2091	7.2145
neg_7072	1-(sn-Glycero-3-phospho)-1D-myo-inositol	metab_14162	1.0847	0.0006039	0.964408	Down	C01225	HMDB0011649	333.059	neg	M-H	C9H19O11P	0.5763	0.0233139	-	75.8	-1.70249	-	-	-	-	-	-	-	Lipids and lipid-like molecules	Glycerophospholipids	Glycerophosphoinositols	6.8349	6.7687	6.771	6.6651	6.6808	6.5118	6.8786	6.9734	6.9568	7.0215	6.9546	6.9322	6.8823	6.8628	6.8682
neg_7093	Heteroartonin A	metab_14182	1.2943	0.001515	0.938541	Down	-	HMDB0041323;LMPK12110909	473.162	neg	M+Na-2H	C26H28O7	0.5687	0.0387723	-	55.4	7.41385	170894-23-2	-	-	-	-	-	-	Phenylpropanoids and polyketides	Flavonoids	Flavones	5.5508	5.6926	5.6233	5.628	5.495	5.165	5.8966	5.962	5.9728	5.8744	5.7556	5.8644	5.678	5.6467	5.6522
neg_7105	N-Methyl-1-deoxynojirimycin	metab_14194	1.8761	9.52e-05	0.879719	Down	-	HMDB0035360	214.048	neg	M+K-2H	C7H15NO4	0.5687	0.0281195	-	76	-5.69716	69567-10-8	-	-	-	-	-	-	Organoheterocyclic compounds	Piperidines	Not Available	5.097	5.2189	5.169	4.9864	4.9412	4.6074	5.4273	5.8099	5.6075	5.7637	5.6836	5.8324	5.4733	5.4493	5.4581
neg_7124	Glutamylarginine	metab_14213	1.7366	7.69e-06	1.10225	UP	-	HMDB0028813	302.146	neg	M-H	C11H21N5O5	0.5612	0.0401722	-	67.4	-3.19389	7219-59-2	-	-	-	-	-	-	Organic acids and derivatives	Carboxylic acids and derivatives	Amino acids, peptides, and analogues	5.7075	5.6896	5.8009	5.674	5.6506	5.5219	5.1348	5.0092	5.3311	5.1355	5.2462	5.0297	5.5355	5.5006	5.5203
neg_7195	Neuraminic acid	metab_14284	1.3701	0.0005736	1.08222	UP	C06469	HMDB0000830	312.096	neg	M+FA-H	C9H17NO8	0.5382	0.0191954	-	68.8	9.43967	114-04-5	Carbohydrates	Monosaccharides	-	-	-	-	Organic oxygen compounds	Organooxygen compounds	Carbohydrates and carbohydrate conjugates	5.0692	4.9407	4.9248	4.8353	4.933	5.2349	4.609	4.6421	4.8174	4.4858	4.6245	4.4845	4.9193	4.906	4.9041
