# Supplementary material for: Identification of a New Giant Emrbryo Allele, and Integrated Transcriptomics and Metabolomics Analysis of Giant Embryo Development in Rice
Source: Frontiers journal article supplement (doi:10.3389/fpls.2021.697889), 2021-08-09
Supplement: Table_6.XLS [file Table_6.XLS]

## Sheet: kegg_table
Gene//Meta	Regulate	KO//CID	Pathway_Id	Pathway_definition
(all-Z)-8,11,14-Heptadecatrienal	down	C16343	map00592	alpha-Linolenic acid metabolism
13(S)-HOTrE	down	C16316	map00592	alpha-Linolenic acid metabolism
OsZS_04G0329700	down	K05894	map00592	alpha-Linolenic acid metabolism
4-Hydroxyphenylpyruvic acid	up	C01179	map00261	Monobactam biosynthesis
OsZS_09G0196800	up	K12524	map00261	Monobactam biosynthesis
L-Aspartic acid	up	C00049	map00261	Monobactam biosynthesis
OsZS_09G0262200	down	K05933	map00270	Cysteine and methionine metabolism
L-Aspartic acid	up	C00049	map00270	Cysteine and methionine metabolism
OsZS_02G0118500	up	K01738	map00270	Cysteine and methionine metabolism
OsZS_01G0494300	up	K00640	map00270	Cysteine and methionine metabolism
OsZS_06G0303600	up	K14455	map00270	Cysteine and methionine metabolism
OsZS_09G0196800	up	K12524	map00270	Cysteine and methionine metabolism
L-Aspartic acid	up	C00049	map00260	Glycine, serine and threonine metabolism
Creatine	down	C00300	map00260	Glycine, serine and threonine metabolism
Betaine	down	C00719	map00260	Glycine, serine and threonine metabolism
OsZS_09G0304800	down	K00306	map00260	Glycine, serine and threonine metabolism
L-Tryptophan	up	C00078	map00260	Glycine, serine and threonine metabolism
OsZS_09G0196800	up	K12524	map00260	Glycine, serine and threonine metabolism
OsZS_02G0378000	down	K18121	map00630	Glyoxylate and dicarboxylate metabolism
D-Tartaric acid	up	C00898	map00630	Glyoxylate and dicarboxylate metabolism
OsZS_12G0142600	up	K00051	map00710	Carbon fixation in photosynthetic organisms
L-Aspartic acid	up	C00049	map00710	Carbon fixation in photosynthetic organisms
OsZS_03G0303200	up	K01006	map00710	Carbon fixation in photosynthetic organisms
OsZS_10G0129500	up	K01610	map00710	Carbon fixation in photosynthetic organisms
OsZS_04G0149600	down	K01100	map00710	Carbon fixation in photosynthetic organisms
OsZS_06G0303600	up	K14455	map00710	Carbon fixation in photosynthetic organisms
OsZS_01G0527400	down	K01595	map00710	Carbon fixation in photosynthetic organisms
Saccharopine	up	C00449	map00310	Lysine degradation
OsZS_09G0304800	down	K00306	map00310	Lysine degradation
OsZS_02G0528500	up	K00128	map00310	Lysine degradation
L-Lysine	up	C00047	map00310	Lysine degradation
Allysine	up	C04076	map00310	Lysine degradation
L-Lysine	up	C00047	map00300	Lysine biosynthesis
L-Aspartic acid	up	C00049	map00300	Lysine biosynthesis
Saccharopine	up	C00449	map00300	Lysine biosynthesis
Allysine	up	C04076	map00300	Lysine biosynthesis
Diaminopimelic acid	up	C00666	map00300	Lysine biosynthesis
OsZS_09G0196800	up	K12524	map00300	Lysine biosynthesis
Ribose 1-phosphate	down	C00620	map00030	Pentose phosphate pathway
OsZS_02G0412200	up	K00036	map00030	Pentose phosphate pathway
OsZS_12G0349500	down	K01850	map00400	Phenylalanine, tyrosine and tryptophan biosynthesis
OsZS_06G0303600	up	K14455	map00400	Phenylalanine, tyrosine and tryptophan biosynthesis
4-Hydroxyphenylpyruvic acid	up	C01179	map00400	Phenylalanine, tyrosine and tryptophan biosynthesis
L-Tryptophan	up	C00078	map00400	Phenylalanine, tyrosine and tryptophan biosynthesis
3-Hydroxyanthranilic acid	up	C00632	map00380	Tryptophan metabolism
Tryptophanol	up	C00955	map00380	Tryptophan metabolism
Indole-3-acetamide	up	C02693	map00380	Tryptophan metabolism
5-Hydroxy-L-tryptophan	up	C00643	map00380	Tryptophan metabolism
Serotonin	up	C00780	map00380	Tryptophan metabolism
L-Tryptophan	up	C00078	map00380	Tryptophan metabolism
OsZS_02G0528500	up	K00128	map00380	Tryptophan metabolism
Xanthurenic Acid	up	C02470	map00380	Tryptophan metabolism
OsZS_02G0528500	up	K00128	map00410	beta-Alanine metabolism
L-Aspartic acid	up	C00049	map00410	beta-Alanine metabolism
OsZS_04G0535900	down	K17839	map00410	beta-Alanine metabolism
Pantothenic Acid	up	C00864	map00410	beta-Alanine metabolism
4-Hydroxyphenylpyruvic acid	up	C01179	map00130	Ubiquinone and other terpenoid-quinone biosynthesis
OsZS_03G0478600	down	K19222	map00130	Ubiquinone and other terpenoid-quinone biosynthesis
L-Isoleucine	up	C00407	map00280	Valine, leucine and isoleucine degradation
OsZS_02G0528500	up	K00128	map00280	Valine, leucine and isoleucine degradation
OsZS_02G0528500	up	K00128	map00340	Histidine metabolism
L-Aspartic acid	up	C00049	map00340	Histidine metabolism
9(S)-HPODE	down	C14827	map00591	Linoleic acid metabolism
OsZS_03G0520500	down	K15718	map00591	Linoleic acid metabolism
UDP-D-apiose	down	C01623	map00520	Amino sugar and nucleotide sugar metabolism
OsZS_01G0149500	up	K00963	map00520	Amino sugar and nucleotide sugar metabolism
OsZS_09G0308100	down	K08679	map00520	Amino sugar and nucleotide sugar metabolism
OsZS_04G0478900	up	K18677	map00520	Amino sugar and nucleotide sugar metabolism
OsZS_08G0434400	up	K01183	map00520	Amino sugar and nucleotide sugar metabolism
Benzoic acid	up	C00180	map00360	Phenylalanine metabolism
OsZS_09G0291300	up	K00588	map00360	Phenylalanine metabolism
OsZS_06G0303600	up	K14455	map00360	Phenylalanine metabolism
M-Coumaric acid	down	C12621	map00360	Phenylalanine metabolism
Creatine	down	C00300	map00330	Arginine and proline metabolism
OsZS_04G0007600	down	K01583	map00330	Arginine and proline metabolism
OsZS_04G0535900	down	K17839	map00330	Arginine and proline metabolism
Ornithine	up	C00077	map00330	Arginine and proline metabolism
OsZS_03G0445500	up	K01581	map00330	Arginine and proline metabolism
OsZS_10G0381200	down	K00318	map00330	Arginine and proline metabolism
OsZS_02G0528500	up	K00128	map00330	Arginine and proline metabolism
OsZS_06G0303600	up	K14455	map00330	Arginine and proline metabolism
Vitexin	down	C01460	map00941	Flavonoid biosynthesis
OsZS_09G0291300	up	K00588	map00941	Flavonoid biosynthesis
OsZS_08G0455700	down	K13065	map00941	Flavonoid biosynthesis
Chlorogenic acid	up	C00852	map00941	Flavonoid biosynthesis
OsZS_12G0142600	up	K00051	map00620	Pyruvate metabolism
S-Lactoylglutathione	up	C03451	map00620	Pyruvate metabolism
OsZS_02G0260900	down	K00627	map00620	Pyruvate metabolism
OsZS_01G0527400	down	K01595	map00620	Pyruvate metabolism
OsZS_10G0129500	up	K01610	map00620	Pyruvate metabolism
OsZS_02G0528500	up	K00128	map00620	Pyruvate metabolism
OsZS_03G0303200	up	K01006	map00620	Pyruvate metabolism
OsZS_01G0149500	up	K00963	map00052	Galactose metabolism
OsZS_02G0346800	down	K01193	map00052	Galactose metabolism
Raffinose	down	C00492	map00052	Galactose metabolism
OsZS_04G0308800	down	K01193	map00052	Galactose metabolism
N2-Acetyl-L-ornithine	up	C00437	map00220	Arginine biosynthesis
L-Aspartic acid	up	C00049	map00220	Arginine biosynthesis
Argininosuccinic acid	up	C03406	map00220	Arginine biosynthesis
N-Acetylglutamic acid	up	C00624	map00220	Arginine biosynthesis
Ornithine	up	C00077	map00220	Arginine biosynthesis
OsZS_04G0419400	down	K00261	map00220	Arginine biosynthesis
OsZS_06G0303600	up	K14455	map00220	Arginine biosynthesis
OsZS_04G0419400	down	K00261	map00250	Alanine, aspartate and glutamate metabolism
Argininosuccinic acid	up	C03406	map00250	Alanine, aspartate and glutamate metabolism
OsZS_06G0303600	up	K14455	map00250	Alanine, aspartate and glutamate metabolism
Adenylosuccinate	down	C03794	map00250	Alanine, aspartate and glutamate metabolism
L-Aspartic acid	up	C00049	map00250	Alanine, aspartate and glutamate metabolism
OsZS_03G0579600	up	K00417	map00190	Oxidative phosphorylation
NADH	up	C00004	map00190	Oxidative phosphorylation
NADH	up	C00003	map00190	Oxidative phosphorylation
OsZS_11G0149900	up	K02108	map00190	Oxidative phosphorylation
OsZS_07G0430000	down	K00121	map00350	Tyrosine metabolism
4-Hydroxyphenylpyruvic acid	up	C01179	map00350	Tyrosine metabolism
OsZS_06G0303600	up	K14455	map00350	Tyrosine metabolism
OsZS_03G0598600	up	K01557	map00350	Tyrosine metabolism
L-Isoleucine	up	C00407	map00460	Cyanoamino acid metabolism
L-Aspartic acid	up	C00049	map00460	Cyanoamino acid metabolism
OsZS_06G0198100	down	K01188	map00460	Cyanoamino acid metabolism
N,N-Dihydroxy-L-tyrosine	up	C15503	map00460	Cyanoamino acid metabolism
OsZS_01G0494000	up	K06124	map00564	Glycerophospholipid metabolism
Glycerophosphocholine	down	C00670	map00564	Glycerophospholipid metabolism
OsZS_05G0437300	down	K05929	map00564	Glycerophospholipid metabolism
LysoPC(15:0)	down	C04230	map00564	Glycerophospholipid metabolism
LPC(16:0)	down	C04230	map00564	Glycerophospholipid metabolism
